34 Receptor recognition and subsequent membrane fusion are essential for the  
35 establishment of successful infection by SARS-CoV-2. Halting these steps can cure  
36 COVID-19. Here we have identified and characterized a potent human monoclonal  
37 antibody, HB27, that blocks SARS-CoV-2 attachment to its cellular receptor at sub-nM  
38 concentrations. Remarkably, HB27 can also prevent SARS-CoV-2 membrane fusion.  
39 Consequently, a single dose of HB27 conferred effective protection against SARS-  
40 CoV-2 in two established mouse models. Rhesus macaques showed no obvious adverse  
41 events when administrated with 10-fold of effective dose of HB27. Cryo-EM studies  
42 on complex of SARS-CoV-2 trimeric S with HB27 Fab reveal that three Fab fragments  
43 work synergistically to occlude SARS-CoV-2 from binding to ACE2 receptor. Binding  
44 of the antibody also restrains any further conformational changes of the RBD, possibly  
45 interfering with progression from the prefusion to the postfusion stage. These results  
46 suggest that HB27 is a promising candidate for immuno-therapies against COVID-19.

47

48

49 **Keywords:** SARS-CoV-2, COVID-19, *in vivo* protection, preclinical safety evaluation,  
50 human neutralizing antibody, immuno-therapy, Cryo-EM structure.

51

## 52 Highlights

53 1. SARS-CoV-2 specific antibody, HB27, blocks viral receptor binding and membrane  
54 fusion

55 2. HB27 confers prophylactic and therapeutic protection against SARS-CoV-2 in mice  
56 models

57 3. Rhesus macaques showed no adverse side effects when administered with HB27

58 4. Cryo-EM studies suggest that HB27 sterically occludes SARS-CoV-2 from its  
59 receptor

60

61

62

63

## 64 Introduction

65 On March 11<sup>th</sup> 2020, the World Health Organization declared the 2019 coronavirus

66 disease (COVID-19) as a pandemic. Severe acute respiratory syndrome coronavirus 2  
67 (SARS-CoV-2), the etiological agent of this pandemic continues to ravage the global  
68 population, causing millions of infections. Losses in lives, declining wellbeing, and  
69 disruption of economic activities as a result of the infections have strained societies and  
70 significant impacted on people's normal life. SARS-CoV-2 belongs to the  
71 betacoronavirus genus, five coronaviruses of which, together with two  
72 alphacoronaviruses, endowed with an ability to infect humans (Lu et al., 2020; Zhou et  
73 al., 2020). Among these, infections caused by SARS-CoV, SARS-CoV-2 and Middle  
74 East Respiratory Syndrome coronavirus (MERS-CoV) are known to culminate into  
75 more severe clinical manifestations (Gao et al., 2020). To date, no specific drugs or  
76 vaccines effective against these highly pathogenic coronaviruses have been approved.

77

78 Like, SARS-CoV, SARS-CoV-2 utilizes its protuberant S glycoprotein to engage with  
79 its cellular receptor, human angiotensin converting enzyme 2 (ACE2), for forging  
80 membrane fusion in order to enter host cell (Gallagher and Buchmeier, 2001; Hoffmann  
81 et al., 2020). Each monomeric S protein can be cleaved by host proteases, such as  
82 TMPRSS2 (Hoffmann et al., 2020; Shang et al., 2020) into two functional domains, the  
83 distal globular S1 domain and the membrane-proximal S2 domain, which mediate  
84 receptor binding and membrane fusion, respectively (Li, 2016). The S1 subunit consists  
85 of an N-terminal domain (NTD) and a C-terminal domain, which often functions as the  
86 receptor binding domain (RBD). Conformational transitions are triggered upon release  
87 of the S1 subunit after receptor binding and subsequent priming of the protein by host  
88 cell proteases. These two key events advance the life-cycle of the virus from the  
89 prefusion to the postfusion stage, leading to the fusion of the viral membrane with that  
90 of the host cell (Li, 2016; Walls et al., 2017).

91

92 Such important roles played by S during viral infection make them valuable targets for  
93 antibody-based drug and vaccine design (Pallesen et al., 2017). Previous structural  
94 studies have revealed that the S trimer can switch between a receptor-accessible state  
95 where one or more RBDs are in the open conformation and a receptor-inaccessible state  
96 where all the RBDs are in the closed conformation. This switch is accomplished

97 through a hinge-like movement of the RBD, indicative of a dynamic and complicated  
98 protein-protein interaction mode with host cells (Gui et al., 2017; Kirchdoerfer et al.,  
99 2016; Walls et al., 2020; Wrapp et al., 2020; Zhe Lv, 2020). Although numerous  
100 neutralizing antibodies (NAbs) targeting the RBDs of SARS-CoV or MERS have been  
101 reported (Corti et al., 2015; Du et al., 2009; Walls et al., 2019), the immunogenic  
102 features and key epitopes of SARS-CoV-2 remain poorly characterized. Recently, a  
103 cross-binding mAb, CR3022, was demonstrated to neutralize SARS-CoV, but it failed  
104 to efficiently prevent SARS-CoV-2 infection, highlighting the challenges posed by  
105 conformationally flexible virus-specific neutralizing epitopes in conferring protection  
106 against infection (Yuan et al., 2020). More recently, a number of NAbs have been shown  
107 to block the binding of SARS-CoV-2 to ACE2 and another RBD-targeting NAb, S309,  
108 acted by inducing antibody-dependent cell cytotoxicity (ADCC) which surprisingly did  
109 not involve the blocking of virus-receptor interaction (Pinto et al., 2020; Wu et al.,  
110 2020). This raises the possibility of existence of hitherto undiscovered neutralization  
111 mechanisms for SARS-CoV-2 RBD-targeting NAbs. A detailed understanding of the  
112 mechanisms underlying the neutralization of SARS-CoV-2 is likely to help provide new  
113 guidance for the development of antiviral therapeutics and rational vaccine design.

114

## 115 **Results**

### 116 **Phage display identifies a potent SARS-CoV-2 specific NAb**

117 We previously identified a set of NAbs from an antibody library which was generated  
118 from RNAs extracted from peripheral lymphocytes of mice immunized with  
119 recombinant SARS-CoV RBD protein (Zhe Lv, 2020). In this study, we constructed  
120 another antibody library by immunizing mice with recombinant SARS-CoV-2 RBD,  
121 which yielded a chimeric anti-SARS-CoV-2 mAb, named mhB27. mhB27 was able to  
122 strongly bind to SARS-CoV-2 RBD and exhibited potent neutralizing activities against  
123 SARS-CoV-2 when tested in a vesicular stomatitis virus (VSV) pseudotyping system  
124 (PSV) (Figure S1). A humanized antibody HB27 was generated based on the sequences  
125 of mhB27. To investigate the viral specificity of HB27, we performed binding assays  
126 measuring the ability of HB27 to bind the RBDs of SARS-CoV, SARS-CoV-2 and  
127 MERS-CoV. Analysis of the data obtained from real-time quantitation and kinetic

128 characterization of biomolecular interactions using OCTET system demonstrated that  
129 both immunoglobulin G (Ig G) and Fab fragments of HB27 bind tightly to SARS-CoV-  
130 2 RBD with affinities of 0.07 nM and 0.27 nM, respectively. However, this antibody  
131 exhibits undetectable interactions with the RBDs of SARS-CoV and MERS-CoV,  
132 suggesting that HB27 is SARS-CoV-2-specific (Figure 1A-1C). HB27 showed potent  
133 neutralizing activities against SARS-CoV-2 with a 50% inhibition concentration (IC<sub>50</sub>)  
134 value of 0.04 nM. Perhaps correlated with the inability to interact with SARS-CoV  
135 RBD, HB27 possessed no inhibition activity against SARS-CoV in PSV-based  
136 neutralization assays (Figure 1D-1E). Classical plaque reduction neutralization test  
137 (PRNT) conducted against an authentic SARS-CoV-2 strain (BetaCoV/Beijing/IME-  
138 BJ01/2020) further verified its neutralizing activity with a PRNT<sub>50</sub> value of 0.22 nM  
139 (Figure 1F).

140

#### 141 **Prophylactic and therapeutic efficacy of HB27 in SARS-CoV-2 susceptible mice**

142 Given the excellent neutralizing activities at sub-nM concentrations, we next sought to  
143 assess the correlation between *in vitro* neutralization and *in vivo* protection. The HB27  
144 produced in the CHO cell line was first tested in a newly established mouse model  
145 based on a SARS-CoV-2 mouse adapted strain MASCP6 (Gu et al., 2020). Upon  
146 MASCP6 intranasal challenge, adult BALB/c sustained robust viral replication in the  
147 lungs at 3-5 days post inoculation. To evaluate the protection efficacy of HB27, BALB/c  
148 mice challenged with MASCP6 were administered a single dose of 20 mg/kg of HB27  
149 in prophylactic as well as therapeutic settings (Figure 2A). As expected, high levels of  
150 viral RNAs were detected in the lungs and trachea at 3 and 5 days post infection in the  
151 control group of mice treated with PBS (Figure 2B-2C). Remarkably, a single dose of  
152 HB27 administered either before or post SARS-CoV-2 exposure resulted in >99.9%  
153 reduction of the viral RNA loads in the lungs and trachea (Figure 2B-2C).

154

155 Furthermore, we validated the *in vivo* protection efficacy of HB27 in a human ACE2  
156 (hACE2) humanized mouse model that was susceptible to SARS-CoV-2 infection (Sun  
157 et al., 2020). Similar to the studies with the MASCP6 strain of mice, either prophylactic  
158 or therapeutic administration of HB27 conferred a clear benefit on the hACE2

159 humanized mouse model as indicated by a significant reduction in viral RNA loads in  
160 the lungs and trachea at day 5 post SARS-CoV-2 challenge. Prophylactic administration  
161 of HB27 showed a more potent antiviral effect, resulting in >1,000- fold reduction in  
162 lung viral levels (Figure 2D-2E). A direct challenge via administration of excessive (up  
163 to  $5 \times 10^5$  PFU) SARS-CoV-2 through the intranasal route, where the IgG antibodies  
164 may not be able to directly engage the target, could lead to virus particles gaining access  
165 to the lung and trachea. Such experimental observations in the prophylactic and  
166 therapeutic settings for many other protective human antibodies against SARS-CoV-2  
167 have been reported (Zhe Lv, 2020; Zost et al., 2020). However, it's worthy to note that  
168 no infectious virions could be detected in the lung at day 3 and day 5 as measured by a  
169 plaque assay of lung tissue homogenates (Figure 2F). These results suggest that the low  
170 levels of viral RNA copies detected in the lung/trachea might be the remnants of the  
171 viral genomes from the infection at the very early stage. Histopathological examination  
172 revealed moderate interstitial pneumonia, characterized by inflammatory cell  
173 infiltration, alveolar septal thickening and distinctive vascular system injury developed  
174 in hACE2 humanized mice belonging to the PBS control group at day 5 (Figure 2G).  
175 In contrast, the lungs in mice from the HB27 treated group only showed minimal or  
176 very mild inflammatory cell infiltration, and no obvious lesions of alveolar epithelial  
177 cells or focal hemorrhage (Figure 2G). Collectively, these results clearly demonstrated  
178 the utility of HB27 for prophylactic or therapeutic purposes against SARS-CoV-2.

179

### 180 **Evaluation of the safety of administration of HB27 in non-human primates**

181 As part of the non-clinical safety studies prior to the conduction of human clinical trials  
182 for pharmaceuticals, we systematically evaluated the safety of administration of HB27  
183 in rhesus macaques. Two groups of 4 animals (n=4) were administered a single  
184 intravenous high dose (500 mg/kg, 10-fold of estimated effective dose in human) of  
185 HB27 or placebo. HB27 serum concentrations, clinical observations and biological  
186 indices were monitored closely for 16 days (Figure 3). Neither fever nor weight loss  
187 was observed in any macaque after the infusion of HB27, and the appetite and mental  
188 state of all animals remained normal. The toxicokinetics of HB27 in rhesus macaques  
189 was evaluated by measuring HB27 levels in serum pre-infusion and at indicated time

190 intervals after administration. A mean maximum serum concentration (C<sub>max</sub>) of 12.8  
191 mg/mL ( $\pm$  0.8) of HB27 could be achieved and the average half-life of the antibody was  
192 10.0 days ( $\pm$  2.2) (Figure 3A and Table S1). Notably, prophylactic and therapeutic  
193 efficacy of HB27 in animal models revealed that >99.9% of the viral RNA loads in the  
194 lungs and trachea could be reduced at 5 days post infection (Figure 2), suggesting that  
195 a half-life of 10 days for HB27 is probably sufficient for deriving therapeutic benefit.  
196 Details of the results of the measurements of toxicokinetic parameters are presented in  
197 Table S1. These results suggest that HB27 probably has pharmacokinetic properties  
198 consistent with a typical human IgG1. Hematological and biochemical analysis,  
199 including biochemical blood tests and lymphocyte subset percent (CD4<sup>+</sup> and CD8<sup>+</sup>)  
200 showed no notable changes in the HB27 administrated group when compared to the  
201 placebo group (Figure 3B-3D). Taken together, the results of our animal studies indicate  
202 that HB27 is generally safe in non-human primates.

203

#### 204 **HB27 prevents the attachment of SARS-CoV-2 to host cells by blocking its binding** 205 **to ACE2**

206 To evaluate the ability of HB27 to inhibit binding of RBD to ACE2, we performed  
207 competitive binding assays at both protein and cellular levels. Results of the enzyme-  
208 linked immunosorbent assay (ELISA) revealed that HB27 could prevent the binding of  
209 soluble ACE2 (monomer in solution) to SARS-CoV-2 RBD with an EC<sub>50</sub> value of 0.5  
210 nM (Figure S2A). To verify the ability of HB27 to block the binding of ACE2 to  
211 trimeric S, we expressed and purified stabilized SARS-CoV-2 S ectodomain trimer.  
212 Surface plasmon resonance (SPR) assays indicated that HB27 interacts with SARS-  
213 CoV-2 S trimer with a slightly stronger binding affinity (~0.04 nM) (Figure S2B), which  
214 was about 1000-fold higher than that of soluble ACE2 with SARS-CoV-2 S (Figure  
215 S2C) (Shang et al., 2020). For the competitive SPR, two sets of assays: exposing the  
216 trimeric S to HB27 first and then to soluble ACE2, or the other way around, were  
217 conducted. As expected, binding of HB27 completely blocked the interaction between  
218 soluble ACE2 and SARS-CoV-2 trimeric S. Moreover, soluble ACE2 that had already  
219 bound to trimeric S could be replaced by HB27 because of the ~1000-fold difference in  
220 binding affinities of these ligands to the SARS-CoV-2 trimeric S (Figure 4A). Cell-

221 based immunofluorescent blocking assays demonstrated that HB27 could block both  
222 the binding of soluble ACE2 to SARS-CoV-2 S expressing 293T cells and the  
223 attachment of SARS-CoV-2 RBD to ACE2 expressing 293T cells in a dose dependent  
224 manner albeit with relative high  $EC_{50}$  values of about 5-50 nM (Figure 4B and Figure  
225 S2D). Overexpression of ACE2/ S trimer on the 293T cell surface and the presence of  
226 the dimeric form of ACE2 on cell surface are probably the reasons for the substantially  
227 higher concentration of HB27 needed to prevent attachment of the virus to the cell  
228 surface. To further verify these results in cell-based viral infection model, we used real-  
229 time reverse transcriptase-PCR (RT-PCR) to quantify the amount of virus remaining  
230 on the surface of cells that were treated with HB27 pre- and post-viral attachment at  
231 4 °C. In line with the results of the competitive binding assays, HB27 efficiently  
232 prevented SARS-CoV-2 attachment to host cell surface at sub-nM and could displace  
233 the virions that had already bound to the cell surface at ~2.5 nM (Figure 4C).

234

### 235 **HB27 prevents SARS-CoV-2 membrane fusion**

236 A common way to determine whether the antibody inhibits virus-receptor binding or a  
237 post-attachment step of the infection is to compare neutralization curves deduced from  
238 mixing antibody with the virus before or after binding to cells at 4 °C. The assumption  
239 is antibodies that inhibit receptor binding will not have a neutralizing effect on virus  
240 that has already bound to its receptor. However, this assumption may not be true,  
241 because high-affinity antibodies could possibly displace the virus that is already  
242 complexed to a low-affinity receptor, as observed for HB27 (Fig. 4B-4C). Thus,  
243 deriving the mechanism of neutralization by just conducting neutralization assays may  
244 not yield the complete picture, although pre- and post-attachment neutralization assays  
245 suggested that HB27 inhibits a post-attachment step of the infection (Figure 5A). In  
246 coronaviruses, receptor binding and proteolytic processing act in synergy to trigger a  
247 series of conformational changes in S, bringing viral and cellular membranes in  
248 proximity for fusion, leading to establishment of infection (Walls et al., 2017).  
249 TMPRSS2-mediated cleavage is capable of activating the fusion potential of  
250 coronavirus S proteins, inducing receptor-dependent syncytium formation, which was  
251 recently observed in natural SARS-CoV-2 infections as well (Ou et al., 2020; Xia et al.,



252 2020). To explore whether HB27 could interfere with syncytium formation, we  
253 established the S-mediated cell-cell fusion system using 293T cells that express SARS-  
254 CoV-2 S with a GFP tag as the effector cells and Vero-E6 cells as the target cells (Figure  
255 5B). After co-incubation of effector and target cells for 48 h, hundreds of cells fused  
256 together into one large syncytium with multiple nuclei (Figure 5B). Remarkably, HB27  
257 could completely inhibit SARS-CoV-2 mediated cell-cell fusion at the concentration of  
258 0.5  $\mu$ M. Notably, this result is comparable with the inhibition efficiencies of some pan-  
259 coronavirus fusion inhibitors (Figure 5B) (Xia et al., 2020). Neither SARS-CoV-2  
260 RBD-targeting neutralizing antibody, H014 nor the isotype control antibody (anti-  
261 H7N9) could prevent membrane fusion under similar conditions (Figure 5B).  
262 Furthermore, we performed live SARS-CoV-2 neutralization assay in a post-binding  
263 manner in Huh7 cells. Briefly, Huh7 cells were infected with 100 PFU of SARS-CoV-  
264 2 for 1 h at 4 °C. Unbound viral particles were washed away using buffer. After that  
265 cells were further cultured in the presence of a series of concentrations (0, 4, 20 and  
266 100 nM) of HB27, or 100 nM of H014 at 37 °C for 48 h. Similar to S-mediated cell-  
267 cell fusion, the large syncytiums formed by live SARS-CoV-2 infected Huh7 cells were  
268 observed in the absence of HB27 and the presence of 100 nM H014 (Figure 5C).  
269 Expectedly, HB27 could significantly inhibit SARS-CoV-2 mediated formation of the  
270 syncytiums in a dose dependent fashion and completely block the cell-cell fusion at 100  
271 nM (Figure 5C). Notably, such inhibition, to some extent, can possibly be attributed to  
272 the ability of HB27 to strip SARS-CoV-2 off the cell surface. To further characterize  
273 the molecular basis for fusion inhibition by HB27, we established an *in vitro* membrane  
274 fusion assay that treatments of purified SARS-CoV-2 virions by trypsin and ACE2  
275 could trigger viral membrane fusion with liposome at acidic environment. Liposome  
276 fusion results show that HB27, but not H014, is capable of efficiently blocking pH-  
277 dependent fusion of SARS-CoV-2 with liposomes in a dose dependent manner (Figure  
278 5D). The blockage of membrane fusion by HB27 is likely another important mechanism  
279 of neutralization. However, given the relatively higher concentration of HB27 needed  
280 to block viral membrane fusion, blocking viral attachment to its host cell receptor is  
281 likely to be the main mechanism of neutralization.

282

## 283 **Structural basis for the SARS-CoV-2 specific binding of HB27**

284 To delineate the structural basis for HB27-mediated specific neutralization, we  
285 determined the cryo-EM structure of a prefusion stabilized SARS-CoV-2 S ectodomain  
286 trimer in complex with the HB27 Fab fragment using single particle reconstruction.  
287 Similar to previously published studies on *apo* SARS-CoV-2 S trimer, two distinct  
288 conformational states referred to as the “close” and “open” RBDs were observed in the  
289 structure of the complex (Figure 6A). Cryo-EM characterization of the complex showed  
290 full occupancy with one Fab bound to each RBD of the homotrimeric S. We  
291 asymmetrically reconstructed the complex structure at an overall resolution of 3.5 Å,  
292 which represents two “open” and one “close” RBDs (Figure 6A, Figure S3-S4 and  
293 Table S2). The initial maps for the binding interface between RBD and HB27 were  
294 relatively weak due to conformational heterogeneity, which is in line with the structural  
295 observations of stochastic RBD rotations at different angles while switching from the  
296 “closed” to “open” states (Figure 6B-6C). In order to improve the local resolution, we  
297 employed a “block-based” reconstruction approach, which resulted in a 3.9 Å resolution,  
298 enabling reliable analysis of the interaction interface (Figure S3-S4).

299

300 HB27 binds to the apical head of RBD, partially overlapping with the edge of the RBM  
301 core. This binding was independent of glycan recognition (Figure 6D-6E). The head of  
302 RBD inserts into the cavity constructed by five complementarity determining regions  
303 (CDRs, CDRL1, CDRL3 and CDRH1-3), involving extensive hydrophobic interactions  
304 (Figure 6F). The heavy and light chains bury  $\sim 500 \text{ \AA}^2$  and  $\sim 210 \text{ \AA}^2$  of the surface area  
305 of the epitope, respectively. Tight binding is further facilitated by 5 hydrogen bonds  
306 (Figure 6G and Table S3). HB27 epitope includes 12 residues, of which only 7 residues  
307 are conserved between SARS-CoV-2 and SARS-CoV, explaining its specificity for  
308 SARS-CoV-2 for binding and neutralization (Figure S5A). Although a number of point  
309 mutations in the RBD have been reported in currently circulating strains, none of these  
310 mutations lie within the HB27 epitope (Figure S5A). To test the spectrum of  
311 neutralizing activities of HB27 against currently circulating strains of SARS-CoV-2,  
312 RBD mutants bearing various amino acid substitutions reported were expressed and  
313 evaluated for their binding affinities to HB27. In line with structural analysis, all the

314 RBD mutants exhibited comparable binding abilities (Figure S5B). More recently,  
315 SARS-CoV-2 isolates encoding a D614G mutation in the C-terminal region of the S1  
316 predominate (Korber et al.). To investigate the neutralizing activities against this more  
317 contagious isolate, SARS-CoV-2 PSV harboring the D614G mutation was constructed.  
318 Compared to the wild type, HB27 showed similar binding affinities and neutralizing  
319 activities against the D614G mutant (Figure S6), indicating that HB27 possibly exhibits  
320 broad neutralization activity against SARS-CoV-2 strains currently circulating  
321 worldwide.

322

### 323 **Structural dissection of the mechanism of neutralization of SARS-CoV-2 by HB27**

324 Results of our functional studies revealed that HB27 could completely block the  
325 interactions of SARS-CoV-2 with ACE2 (Figure 4). To decipher the structural basis for  
326 this ability of HB27, the complex structures of SARS-CoV-2 trimer/HB27-Fab and  
327 SARS-CoV-2 RBD/ACE2 were superimposed. The superimposition of the structures  
328 revealed that HB27 could sterically hinder ACE2 binding (Figure 7A). Out of the 12  
329 residues in the HB27 epitope, 7 residues are involved in tight contacts with ACE2  
330 (Figure 6E and Figure S7). In addition, the three HB27 Fabs act in synergy to abolish  
331 ACE2 binding, in which binding of any one ACE2 molecule is sterically hindered by  
332 two adjacent HB27 (Figure 7A). Unlike most structural studies of the *apo* SARS-CoV-  
333 2 S trimer or complexes with a major configuration corresponding to one ‘open’ RBD  
334 and the other two RBDs in ‘closed’ states (Walls et al., 2020; Walls et al., 2019; Wrapp  
335 et al., 2020; Zhe Lv, 2020), only one conformational state with one ‘closed’ RBD (mol  
336 A) and two ‘open’ RBDs (mol B and C) was observed in our complex structure.  
337 Interestingly, Fab-A that binds the closed RBD lies between two open RBDs, forming  
338 contacts with the mol B-RBD and the Fab-C located in proximity to the mol C-RBD  
339 (Figure 7B). Probably acting as a bridge, the Fab-A, to some extent, anchors links of  
340 all three RBDs and restrains their conformational transitions (Figure 7B). Perhaps  
341 correlated with this, HB27 possesses the ability to disrupt the membrane fusion event  
342 through restraining the conformational changes playing out during the progression from  
343 the prefusion to the postfusion state. Collectively these data suggest that HB27 might  
344 prevent both the attachment of SARS-CoV-2 to host cells and viral fusion with

345 endosomal membrane. However, fusion blockade by HB27 might be dependent on the  
346 uptakes of antibodies into the endosome.

347

## 348 **Discussion**

349 SARS-CoV-2 shares about 80% sequence identity with SARS-CoV, implying that both  
350 these viral strains share a similar mechanism of establishing an infection, including  
351 targeting a similar spectrum of host cells, employing a similar entry pathway and  
352 hijacking the same cellular receptor (Hoffmann et al., 2020; Zhou et al., 2020). Both  
353 cross-reactive and virus-specific human NAbs have been identified, despite around 77%  
354 of amino-acid sequence identity between the S of SARS-CoV-2 and SARS-CoV  
355 (Brouwer et al., 2020; Hansen et al., 2020; Pinto et al., 2020; Wec et al., 2020; Wu et  
356 al., 2020; Yuan et al., 2020; Zhe Lv, 2020). It is important to decipher the immunogenic  
357 mechanism to discover patterns of different patches comprising different residues  
358 eliciting cross-reactive or virus-specific NAbs with various neutralization mechanisms.  
359 Currently, several cross-reactive mAbs, including CR3022, H014 and S309, screened  
360 from convalescent SARS patients or *via* immunization using SARS-CoV RBD, show  
361 distinct neutralizing activities against SARS-CoV-2 (Pinto et al., 2020; Yuan et al., 2020;  
362 Zhe Lv, 2020). Structural analysis reveals that all these mAbs recognize conserved  
363 patches either distal from or proximal to the edge of the RBM, but not in the RBM.  
364 Interestingly, the corresponding epitope in both open and closed RBDs is accessible to  
365 S309, but accessible to H014 only in open RBDs, and can only be accessed by CR3022  
366 when at least two RBDs are in the open conformation. The stoichiometric binding of  
367 Fab to the S trimer might correlate with the neutralizing activities, probably explaining  
368 the weak neutralization efficiency observed for CR3022. HB27 targets the less  
369 conserved edge of the RBM core with a full occupancy for all RBDs. This structural  
370 observation supports the observed specificity of HB27 for SARS-CoV-2 and its highly  
371 potent neutralization of SARS-CoV-2.

372

373 Our results indicate that HB27 probably inhibits SARS-CoV-2 infection at multiple  
374 steps during the viral entry process. First, viral infection can be stalled by hindering the  
375 attachment of SARS-CoV-2 to host cells by preventing interactions between the RBD

376 and ACE2, which is the major neutralization mechanism for most RBD-targeting NABs.  
377 Upon virus attachment and entry into host cells, proteolytic activation at the S1/S2  
378 boundary leads to S1 dissociation and a dramatic structural change in S2, which triggers  
379 viral membrane fusion (Shang et al., 2020). To date, antibodies that are capable of  
380 interfering with coronavirus fusion have not been reported. HB27 may be involved in  
381 restraining the conformational changes required for the progression of the life cycle of  
382 the virus from the prefusion to the postfusion stage. Furthermore, recent studies suggest  
383 that the SARS-CoV-2 entry depends on ACE2 and cell surface protease TMPRSS2  
384 (Hoffmann et al., 2020; Ou et al., 2020). A blockage of viral attachment to host cell  
385 surface by HB27 possibly affects the colocalization of SARS-CoV-2 S with TMPRSS2  
386 on the cell membrane. This may be yet another way employed by HB27 to prevent viral  
387 membrane fusion where the cleavage of S by TMPRSS2 is averted. Therefore, the  
388 potent neutralizing activity of HB27 probably results from its intervention at two steps  
389 of viral infection, locking away attachment of the virus to its receptor and blocking  
390 membrane fusion; resulting in a double lock.

391  
392 Most importantly, the *in vivo* protection efficacy of HB27 was confirmed in two  
393 established mouse models. The results of these studies consistently showed that a single  
394 dose of HB27 either before or post SARS-CoV-2 exposure not only blocked viral  
395 replication in the lungs and trachea, but also prevented the pulmonary pathological  
396 damage. To date, only a few neutralizing antibodies have been tested in animal models  
397 (Cao et al., 2020; Shi et al., 2020). Previously, we have shown that H014 reduced  
398 pulmonary viral loads by ~100-fold in human ACE2 mice (Zhe Lv, 2020). HB27  
399 exhibits a more potent protective efficacy in reducing viral RNAs (~11,000-fold) with  
400 a much lower administration dose (20 mg/kg v.s. 50 mg/kg). The preliminary results on  
401 the efficacy of the antibody as well as the safety profile of HB27 in Rhesus macaques  
402 support testing of its potential in curing COVID-19 in clinical trials. In fact, while this  
403 manuscript was under review, HB27 entered clinical trials in China (registration  
404 number NCT04483375). More details can be found at  
405 <https://clinicaltrials.gov/ct2/show/NCT04483375?cond=SCTA01&draw=2&rank=1>.

406

407 In summary, our results not only show how increasing access to panels of authentic  
408 neutralizing monoclonal antibodies will facilitate structure-function studies to unpick  
409 the underlying biological processes of virus-host interactions, but also provide  
410 molecular basis for applying HB27 for potential COVID-19 treatment, highlighting the  
411 promise of antibody-based therapeutic interventions.

412

### 413 **Acknowledgements**

414 We thank Dr. Xiaojun Huang, Dr. Boling Zhu, Xianjin Ou and Dr. Gang Ji for cryo-  
415 EM data collection, the Center for Biological imaging (CBI) in Institute of  
416 Biophysics for EM work. Work was supported by the National Key Research and  
417 Development Program (2020YFA0707500, 2018YFA0900801, 2017YFC0840300),  
418 the Strategic Priority Research Program (XDB29010000, XDB37030000), National  
419 Science and Technology Major Projects of Infectious Disease funds (grants  
420 2017ZX103304402), National Natural Science Foundation of China (NSFC) (grants  
421 82041005, 12034006) and the Beijing Municipal Science and Technology Project  
422 (Z201100005420017). Xiangxi Wang was supported by Ten Thousand Talent  
423 Program and the NSFS Innovative Research Group (No. 81921005). Chengfeng Qin  
424 was supported by the National Science Fund for Distinguished Young Scholar (No.  
425 81925025), and the Innovative Research Group (No. 81621005) from the NSFC, and  
426 the Innovation Fund for Medical Sciences (No.2019-I2M-5-049) from the Chinese  
427 Academy of Medical Sciences. Ling Zhu was supported by the Youth Innovation  
428 Promotion Association at the Chinese Academy of Sciences (2019098).

### 429 **Author contributions**

430 X.W., C.F.Q., L.Z., Z.R. and C.S. conceived, designed and supervised the study and  
431 prepared this manuscript. X.W., C.F.Q., L.X. and Y.W. coordinate the project. Z.C.,  
432 Zhe.L. and Y.S. purified proteins; Y.D., R.Z., Q.C., N.Z., Q.Y., X.L. and T.C.  
433 performed live virus and animal assays; C.S., H.W., D.K., J.M., C.L. Y.Z. and L.X.  
434 generated antibodies, constructed mutants and carried out safety evaluations in  
435 macaques; L.C., Z.C., and Y.S prepared cryo-EM grids and collected cryo-EM data;  
436 N.W., L.W., Z.C. and X.W. processed data; L.Z. and X.W. built and refined the

437 structure model; L.Z., N.W. and X.W. analyzed the structures; X.X. performed  
438 liposome membrane fusion assay; C.F., W.H., J.N., Q.L. and Y.W constructed PSV,  
439 PSV-related mutants and PSV-based neutralization. All authors discussed the  
440 experiments and results, read, and approved the manuscript.

#### 441 **Declaration of interests**

442 L.X. and C. S. are inventors on patent application (202010349190.3) submitted by  
443 Sinocelltech. Ltd that covers the intellectual property of HB27. C.S. and L.X. have an  
444 ownership in Sinocelltech. All other authors have no competing interests.

#### 445 **Data and materials availability**

446 Cryo-EM density maps have been deposited at the Electron Microscopy Data Bank  
447 with accession codes EMD-30503 (complex) and EMD-30500 (binding interface)  
448 and related atomic models has been deposited in the protein data bank under  
449 accession code 7CYP and 7CYH, respectively.

450

451

452

453

454

#### 455 **Figure legends**

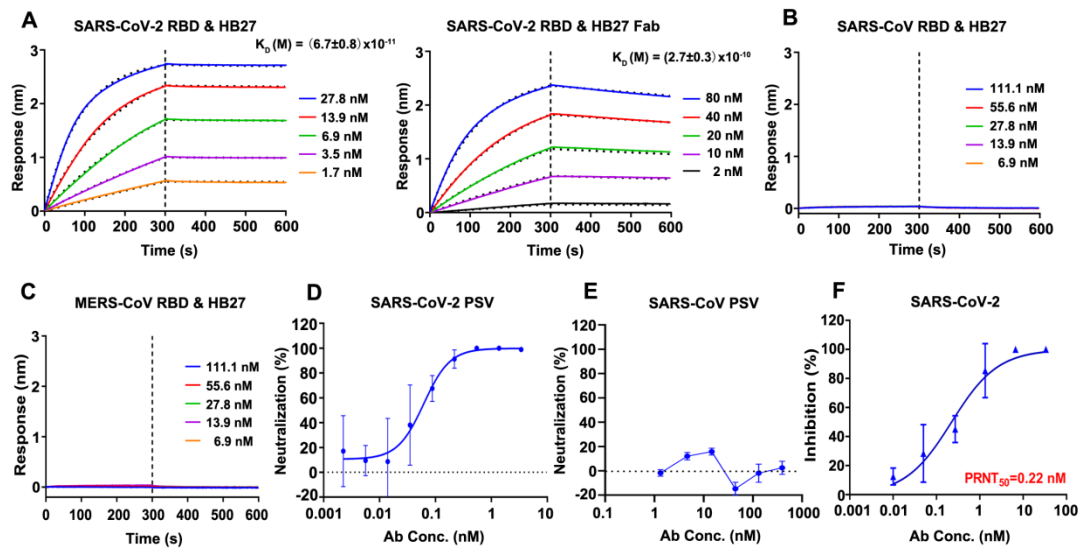

456

457 **Figure 1 HB27 is a SARS-CoV-2-specific antibody of high potency**

458 (A) Analysis of affinity of HB27 (left panel) and HB27 Fab fragments (right panel)  
459 for SARS-CoV-2 RBD. Biotinylated SARS-CoV-2 RBD protein was loaded on Octet  
460 SA sensor and tested for real-time association and dissociation from HB27 IgG and  
461 HB27 Fab fragments, respectively.

462 (B) and (C) Analysis of affinity of HB27 for SARS-CoV RBD and MERS-CoV RBD,  
463 respectively.

464 (D) and (E) Neutralizing activity of HB27 against SARS-CoV-2 and SARS-CoV  
465 pseudoviruses (PSV), respectively. Serially diluted HB27 titres were added to test  
466 neutralizing activity against SARS-CoV-2 and SARS-CoV PSV.

467 (F) *In vitro* neutralization activity of HB27 against SARS-CoV-2 by plaque reduction  
468 neutralization test (PRNT) in Vero cells. Neutralizing activities are represented as  
469 mean  $\pm$  SD. Experiments were performed in duplicates

470 See also Figure S1.

471

472

473

474

475



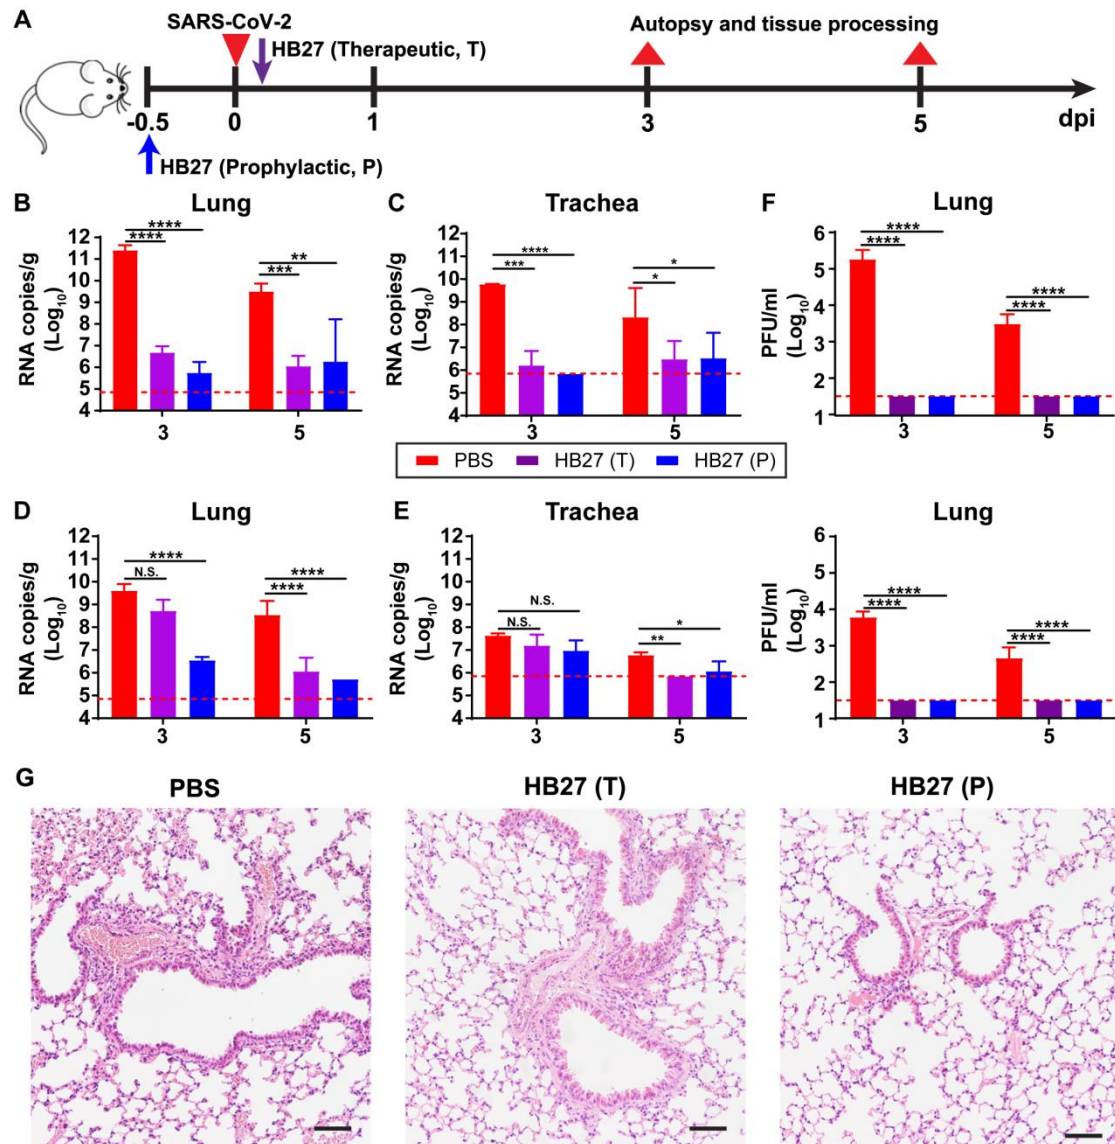

476

477 **Figure 2 Prophylactic and therapeutic efficacy of HB27 in two SARS-CoV-2**  
 478 **susceptible mice models**

479 (A) Experimental design for therapeutic and prophylactic evaluations of HB27 in two  
 480 SARS-CoV-2 susceptible mice models. Group of 6-to-8 week-old hACE2 mice and  
 481 BALB/c mice were infected intranasally with  $5 \times 10^4$  PFU of SARS-CoV-2  
 482 BetaCoV/Beijing/IME-BJ01/2020 or  $1.6 \times 10^4$  PFU of MASCp6 as described previously,  
 483 respectively. A dose of 20 mg/kg HB27 was injected intraperitoneally at 12 hours before  
 484 infection (the prophylactic group, P) or at 2 hours after infection (the therapeutic group,  
 485 T). PBS injections were used as control group. Then, the lung tissues of mice were  
 486 collected at 3 and 5 dpi for virus titer, H&E and Immunostaining.

487 (B) and (C) Virus titers of lung and trachea tissues at 3 or 5 dpi in mouse model based

488 on a SARS-CoV-2 mouse adapted strain MASCp6. The viral loads of the tissues were  
489 determined by qRT-PCR (\*P< 0.05; \*\*P< 0.01; \*\*\*P< 0.001; \*\*\*\*P< 0.0001; n.s., not  
490 significant). Data are represented as mean  $\pm$  SD. Dashed lines represents limit of  
491 detection.

492 (D) and (E) Virus titers of lung and trachea tissues at 3 or 5 dpi in hACE2 humanized  
493 mouse model. The viral loads of the tissues were determined by qRT-PCR (\*P< 0.05;  
494 \*\*P< 0.01; \*\*\*P< 0.001; \*\*\*\*P< 0.0001; n.s., not significant). Data are represented as  
495 mean  $\pm$  SD. Dashed lines represents limit of detection.

496 (F) Viral burden at 3 or 5 dpi in the lungs from two mouse models (up: BALB/c mice;  
497 bottom: hACE2 mice), measured by plaque assay. Data are represented as mean  $\pm$  SD.  
498 Dashed lines represents limit of detection.

499 (G) Histopathological analysis of lung samples at 5 dpi. Scale bar: 100  $\mu$ m.

500

501

502

503

504

505

506

507

508

509

510

511

512

513

514

515

516

517

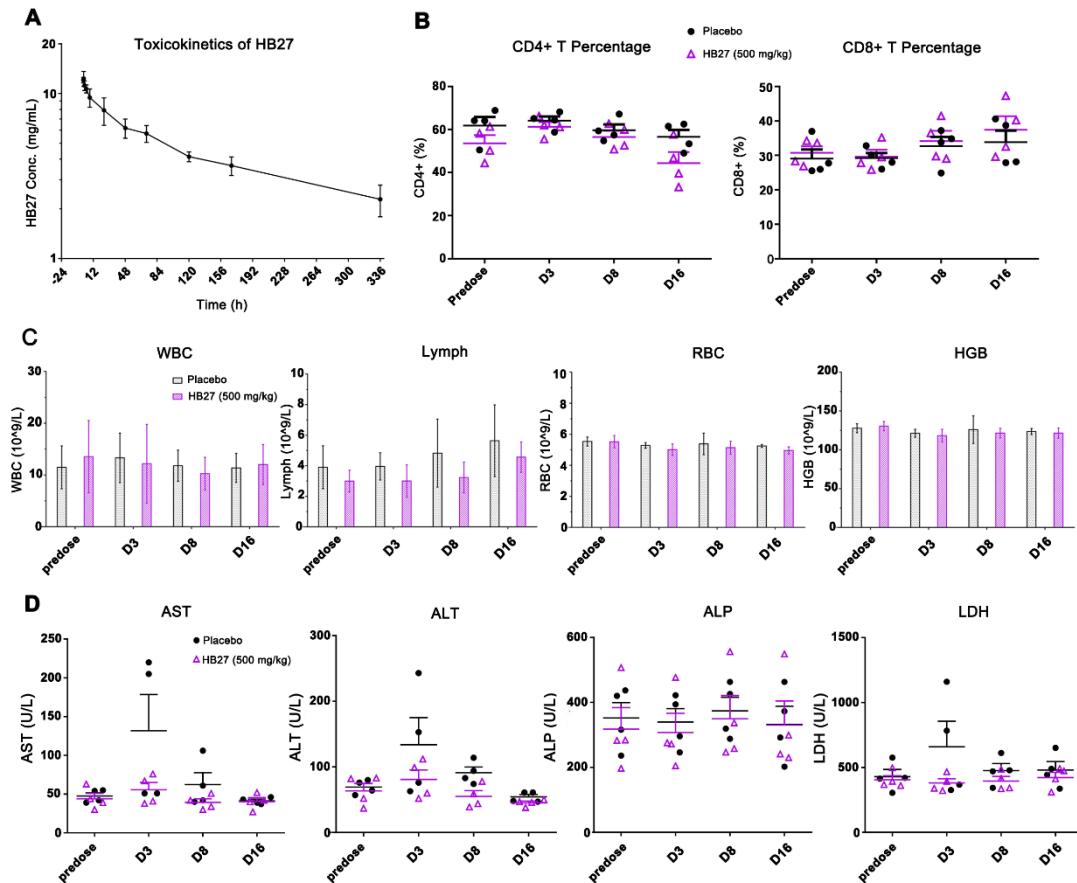

518

519

520 **Figure 3 Safety evaluation of HB27 in rhesus macaques**

521 (A) The toxicokinetics of HB27 in rhesus macaques was evaluated by measuring HB27  
 522 levels in serum predose and at 12, 48, 84, 120, 156h, 192, 228, 264, 300 and 336 hours  
 523 after administration.

524 (B-D) Rhesus macaques were given intravenous injections of a single dose of either  
 525 placebo or HB27 (500 mg/kg), and monitored by lymphocyte subset analysis (B),  
 526 hematological test (C), and biochemical blood test (D) predose and 3, 8 and 16 days  
 527 postdose. WBC: white blood cells; Lymph: lymphocytes; RBC: red blood cells; HGB:  
 528 hemoglobin; AST: aspartate transaminase; ALT: alanine transaminase; ALP:  
 529 alkaline phosphatase; LDH: lactate dehydrogenase

530 See also Table S1.

531

532

533

534

535

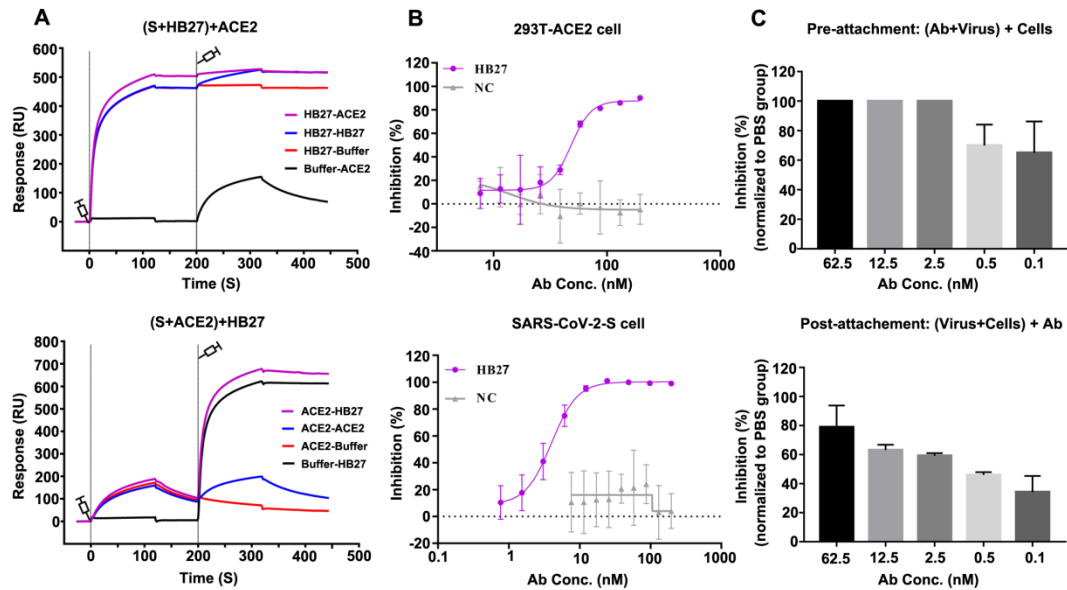

536

537 **Figure 4 HB27 blocks the interactions of SARS-CoV-2 with ACE2**

538 (A) BIAcore SPR kinetics showing the competitive binding of HB27 and ACE2 to  
539 SARS-CoV-2 S trimer. For both panels, SARS-CoV-2 S protein was immobilized onto  
540 the sensor chips. In the upper panel, HB27 was first injected, followed by ACE2,  
541 whereas in the lower panel, ACE2 was injected first and then HB27. The control groups  
542 are as shown by the curves.

543 (B) Blocking of SARS-CoV-2 RBD binding to 293T-ACE2 cells by HB27 (upper  
544 panel). Recombinant SARS-CoV-2 RBD protein and serially diluted HB27 were  
545 incubated with ACE2 expressing 293T cells (293T-ACE2) and tested for binding of  
546 HB27 to 293T-ACE2 cells. Competitive binding of HB27 and ACE2 to SARS-CoV-2-  
547 S cells (lower panel). Recombinant ACE2 and serially diluted HB27 were incubated  
548 with 293T cells expressing SARS-CoV-2 S (SARS-CoV-2-S) and tested for binding of  
549 HB27 to SARS-CoV-2-S cells. BSA was used as a negative control (NC).

550 (C) Amount of virus on the cell surface, as detected by RT-PCR, when exposed to  
551 HB27 prior to (upper panel) and after (lower panel) the virus was allowed to attach  
552 to cells. Values are mean  $\pm$  SD. Experiments were repeated in triplicate.

553 See also Figure S2.

554

555

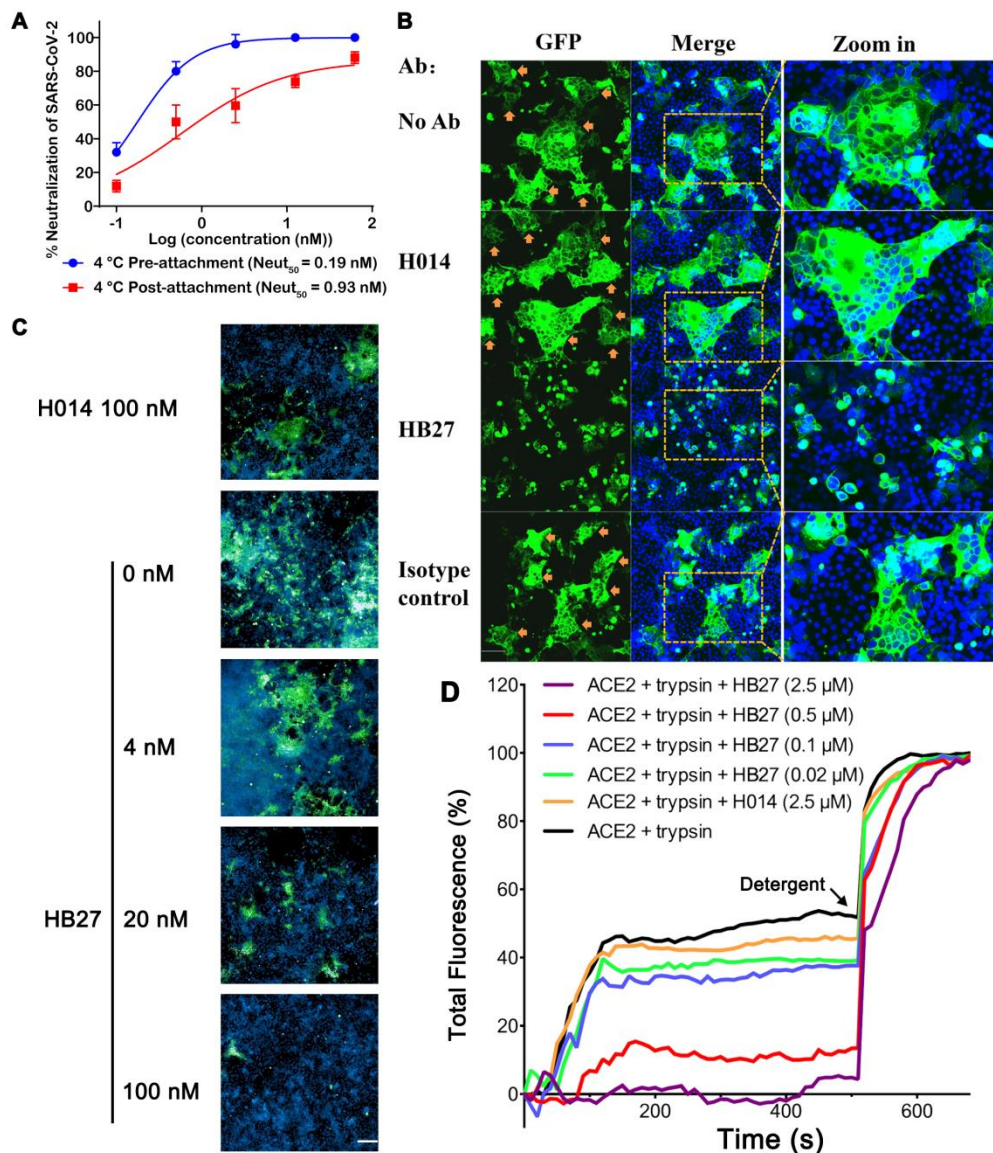

556

557 **Figure 5 HB27 inhibits SARS-CoV-2 membrane fusion.**

558 (A) HB27 had potent neutralization activities when exposed to virus before or after  
559 attachment to Huh7 cells. Values are mean  $\pm$  SD. Experiments were repeated in  
560 triplicate.

561 (B) HB27 inhibits S protein-mediated cell-cell fusion. 293T cells were transfected with  
562 SARS-CoV-2 S-GFP protein, co-cultured with Vero E6 cells in the absence or presence  
563 of 100  $\mu$ g/mL H014 or HB27 or anti-influenza H7N9 antibody (isotype control). No  
564 Ab: in the absence of antibodies. Images were taken after 48 h. Cells were fixed with  
565 4% paraformaldehyde (PFA) at room temperature for 20 min and stained for nuclei with  
566 4,6-diamidino-2-phenylindole (DAPI).

567 (C) HB27 inhibits SARS-CoV-2-mediated cell-cell fusion. Huh7 cells were infected  
568 with 100 PFU of SARS-CoV-2 for 1 h at 4°C and washed for 3 times. After that cells  
569 were further cultured in the presence of a series of concentrations (0, 4, 20 and 100 nM)  
570 of HB27, or 100 nM of H014 at 37 °C for 48 h. Images were taken after 48 h. Cells  
571 were fixed with 4% (w/v) PFA for 20 min and incubated with anti-SARS-CoV-2 S  
572 protein antibody and stained for nuclei with DAPI. Scale bar equals 200 µm.

573 (D) HB27 blocks receptor-mediated fusion of SARS-CoV-2 with liposomes. Liposomes  
574 were loaded with self-quenching concentrations of the fluorescent dye calcein.  
575 Perturbation of the bilayer causes the release of calcein resulting in dilution and a  
576 consequent increase in its fluorescence. Fusion of SARS-CoV-2 with liposomes  
577 occurred in the presence of both ACE2 and trypsin and a series of HB27 concentrations  
578 were used to inhibit the fusion. 10% Triton X-100 treatment was used to achieve 100%  
579 calcein leakage. All data shown are representative of three independent experiments.

580  
581  
582  
583  
584  
585  
586  
587  
588  
589  
590  
591  
592  
593  
594  
595

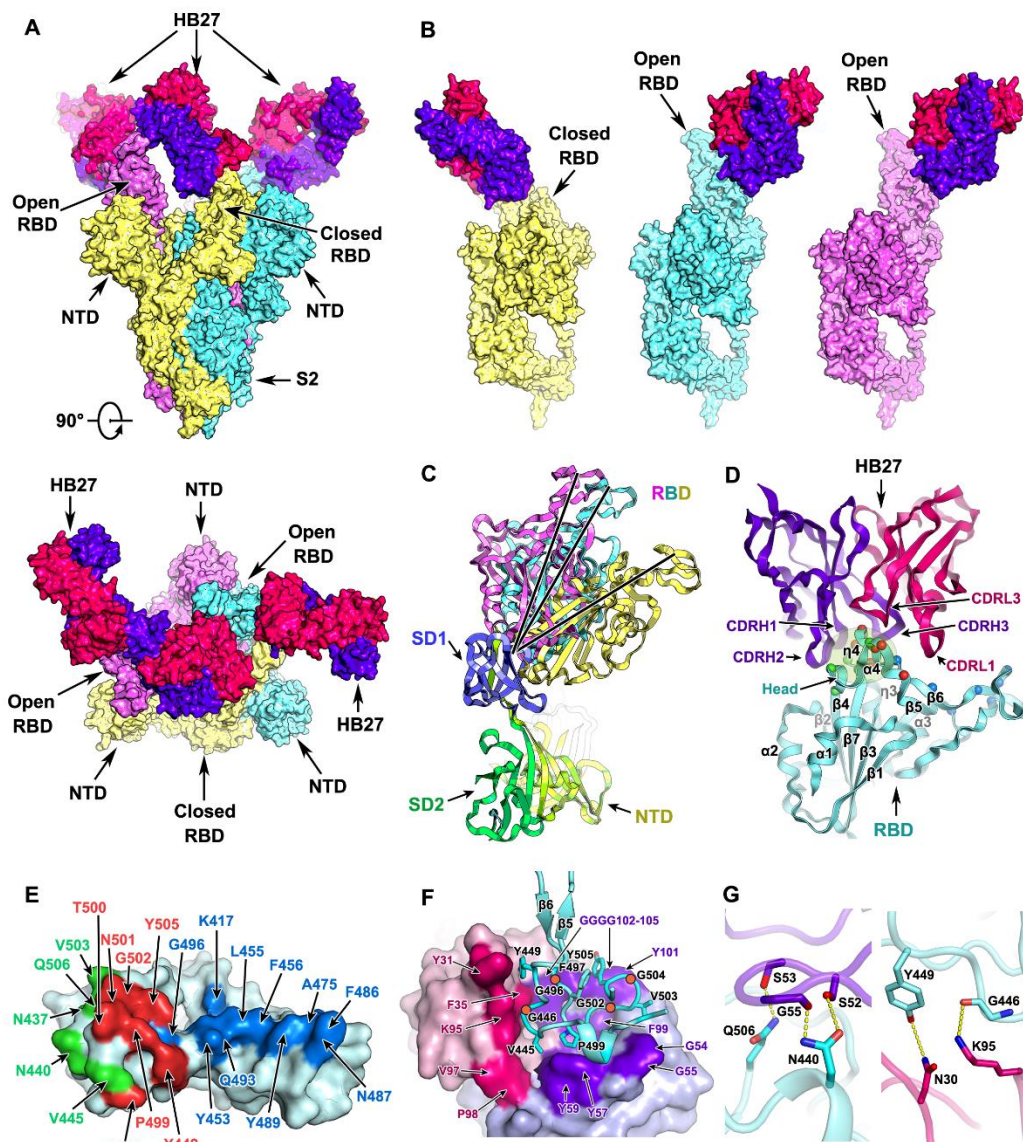

596

597 **Figure 6 Structure and interaction of the SARS-CoV-2 S trimer with HB27.**

598 (A) Orthogonal views of SARS-CoV-2 S trimer in complex with three copies of HB27  
599 Fab.

600 (B) Individual views of the three monomers each complexed with one HB27 Fab. (A)  
601 and (B) The S trimer and HB27 are rendered as molecular surfaces. Three monomers  
602 of the S trimer are colored in yellow, cyan and violet, respectively. The HB27 light and  
603 heavy chains are colored in hotpink and purpleblue, respectively. RBD: receptor  
604 binding domain. NTD: N-terminal domain. S2: the S2 subunit.

605 (C) S1 subunits of the three monomers from SARS-CoV-2 S trimer complexed with  
606 HB27 are superposed; HB27 Fabs are not shown. All domains are presented as ribbon

607 diagrams. Three RBD domains are colored in yellow, cyan and violet, respectively. SD1:  
608 subdomain 1. SD2: subdomain 2.

609 (D) Cartoon representations of the structure of SARS-CoV-2 RBD in complex with  
610 HB27. The RBD is cyan, and the light and heavy chains of HB27 are hotpink and  
611 purpleblue, respectively. Residues constituting the HB27 epitope and the RBM are  
612 drawn as spheres and colored in green and blue, respectively. The overlapped residues  
613 between the HB27 epitope and the RBM are colored in red. The CDRs involved in the  
614 interactions with the RBD are labelled. CDR: complementary determining region.  
615 RBM: receptor binding motif.

616 (E) Residues in SARS-CoV-2 RBD comprising the HB27 epitope and RBM are labeled.  
617 The RBD is rendered as cyan surface. Blue, green and red mark the HB27 epitope, the  
618 RBM and overlapped residues of them both, respectively.

619 (F) Hydrophobic interactions between SARS-CoV-2 RBD and HB27. The RBD is  
620 shown as cyan ribbon diagrams, and the residues of which involved in hydrophobic  
621 interactions with HB27 are shown as side chains and labeled, the four dark orange  
622 circles mark the positions of four glycine residues. The HB27 light and heavy chain are  
623 rendered as light pink and pale blue molecular surfaces, respectively, of which the  
624 residues involved in the hydrophobic interactions with the RBD are highlighted in  
625 hotpink and purpleblue and labeled.

626 (G) A few key interactions between SARS-CoV-2 RBD and the HB27 heavy (left) and  
627 light chain (right). Hydrogen bonds are presented as dashed lines.

628 See also Figures S3, S4 and S5. Tables S2 and S3.

629

630



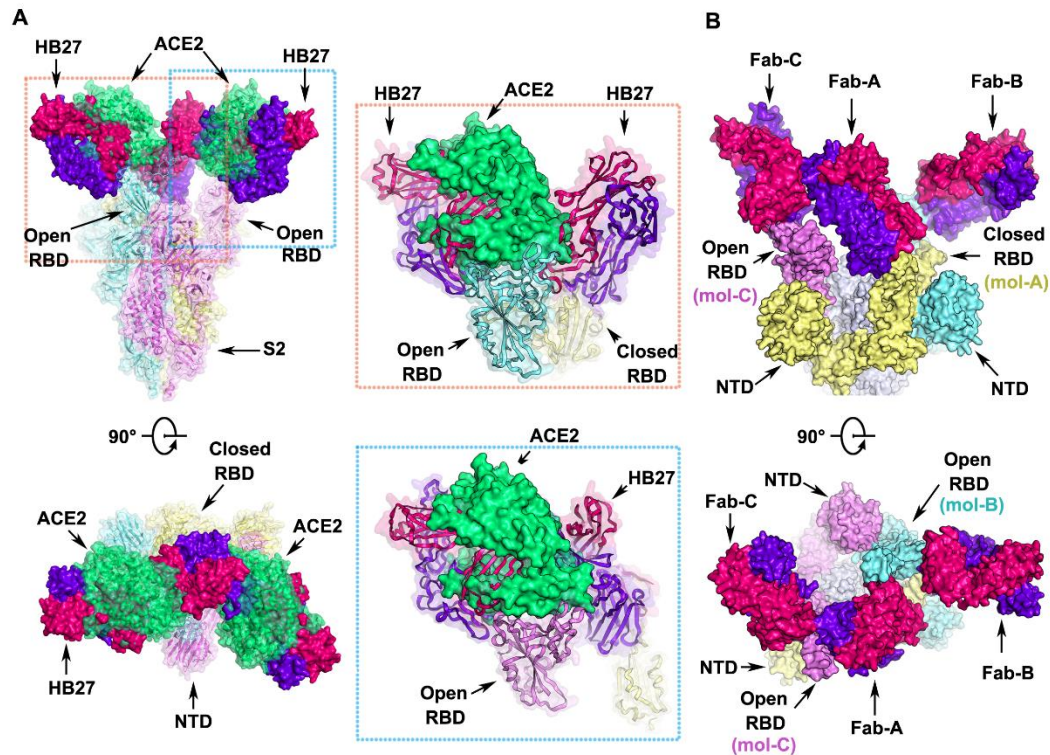

631

632 **Figure 7 Structural basis for neutralization of SARS-CoV-2 by HB27**

633 (A) Orthogonal views of the clashes between HB27 Fabs and ACE2 upon binding to  
634 SARS-CoV-2 S trimer. The SARS-CoV-2 S trimer is presented as ribbon diagrams and  
635 translucent molecular surfaces with three monomers colored in cyan, yellow and violet,  
636 respectively. The three copies of HB27 Fabs are rendered as molecular surfaces colored  
637 the same as in Figure 6. The superposed ACE2 is presented as green ribbon diagrams  
638 as well as translucent molecular surface. Insets are close-up views of the clashes  
639 between ACE2 and HB27 upon binding to SARS-CoV-2 RBD.

640 (B) Orthogonal views of the structure of HB27 Fab-A, Fab-B and Fab-C complexed  
641 with SARS-CoV-2 RBD. The S1 subunits of SARS-CoV-2 S trimer are rendered as  
642 cyan, yellow and violet surfaces and the S2 subunits are rendered as gray surfaces.

643 See also Figures S6 and S7.

644

645

646

647

648

649 **STAR Methods**

650 **Facility and ethics**

651 Experiments involving live SARS-CoV-2 virus were performed in the enhanced  
652 biosafety level 3 (P3+) facilities in the Institute of Microbiology and Epidemiology,  
653 Academy of Military Medical Sciences. All animal experiments were approved by the  
654 Experimental Animal Committee of Laboratory Animal Center, AMMS (approval  
655 number: IACUC-DWZX-2020-001).

656 **Cells and viruses**

657 The human embryonic kidney 293T cell line (Cat: CRL-11268) used for pseudovirus  
658 (PSV) packaging was purchased from ATCC. Vero-E6 cells were purchased from  
659 Chinese Academy of Medical Sciences Cell Bank (Cat: GN017). Vero cells, 293T and  
660 Vero-E6 cells were grown in Dulbecco's modified Eagle's medium (DMEM)  
661 containing 10% (v/v) FBS. The SARS-CoV-2 viral strain BetaCoV/Beijing/IME-  
662 BJ01/2020 was originally isolated from a COVID-19 patient returning from Wuhan,  
663 China. The virus was amplified and titrated by standard plaque forming assay using  
664 Vero cells.

665 **Protein expression and purification**

666 Plasmids for protein expression were constructed by inserting the genomic sequences  
667 of SARS-CoV RBD (residues 306–527, GenBank: NC\_004718.3), SARS-CoV-2 RBD  
668 (residues 319-541, GenBank: MN908947.3), and SARS-CoV-2 S trimer (residues 1–  
669 1208, GenBank:MN908947.3), respectively, into the mammalian expression vector  
670 pCAGGS with a C-terminal 2×StrepTag. Proline substitutions at residues 986 and 987,  
671 a “GSAS” instead of “RRAR” at the furin cleavage site were performed on the gene  
672 encoding S protein based on the research of Jason S. McLellan (Wrapp et al., 2020).  
673 Polyethylenimine was used to transiently transfect HEK Expi 293F cells (Thermo  
674 Fisher) with SARS-CoV RBD, SARS-CoV-2 RBD and SARS-CoV-2 S, respectively.  
675 StrepTactin resin (IBA) was used for protein purification from the cell supernatants,  
676 followed by size-exclusion chromatography with a Superose 6 10/300 column (GE  
677 Healthcare) or a Superdex 200 10/300 Increase column (GE Healthcare) in 20mM Tris,  
678 200 mM NaCl, pH 8.0.

679 **Reagents, recombinant proteins and antibodies**

680 Recombinant RBD protein of SARS-CoV-2 with His tag (Cat: 40150-V08B2<sub>2</sub> monomer  
681 in solution), Recombinant ACE2 protein with His tag (Cat: 10108-H08H, monomer in  
682 solution), transfection reagent Sinofection (Cat: STF02), mammalian expression  
683 plasmids of full-length S protein with GFP tag at the C terminal (Cat: VG40589-  
684 ACGLN) were purchased from Sino Biological. Fetal bovine serum (FBS) (Cat: SA  
685 112.02) were purchased from Lanzhou Minhai Bio-engineering. Luciferase assay  
686 system (Cat: E1501) was purchased from Promega. Anti-human IgG Fc/HRP (Cat:  
687 5210-0165) were purchased from KPL. Goat anti-human IgG F(ab')<sub>2</sub>/HRP (Cat: 109-  
688 036-006) were purchased from Jackson ImmunoResearch.

### 689 **Generation of humanized anti-SARS-CoV-2 antibody HB27**

690 SARS-CoV-2 antibodies were screened from a phage-display scFv library constructed  
691 from the spleen mRNA of mice immunized with recombinant SARS-CoV-2 RBD  
692 protein. SARS-CoV-2 RBD was used as the bait to select for specific anti-RBD scFvs  
693 by biopanning and the scFvs exhibiting potent binding for SARS-CoV-2 RBD were  
694 generated as chimeric antibodies. The chimeric antibodies were expressed using HEK-  
695 293T transient transfection production system and examined for competition activities  
696 with ACE2 for binding to SARS-CoV-2 RBD and neutralizing activities against SARS-  
697 CoV-2 and SARS-CoV pseudoviruses. The chimeric antibody mhB27 exhibited high  
698 binding affinity to SARS-CoV-2 RBD and potent neutralizing activity against SARS-  
699 CoV-2 pseudoviruses, therefore its humanized version-HB27 (Fc modified IgG1  
700 subtype) was further generated.

### 701 **Generation of Fab fragment**

702 The HB27 Fab fragment was prepared using Pierce FAB preparation Kit (Thermo  
703 Scientific) following the manufacturer's instructions. In brief, following removal of the  
704 salt with a desalting column, the antibody was mixed with papain and incubated for  
705 digestion at 37 °C for 3-4 h. The HB27 Fab was separated using protein A affinity  
706 column and concentrated for further applications.

### 707 **Generation of mutant RBDs**

708 Genomic information of SARS-CoV-2 mutant strains were obtained from GISAID  
709 (<https://platform.gisaid.org>), selected site mutants within the RBD domain (residues  
710 306-527) were conducted. The mutated RBD genes with His-tag were cloned into

711 pSTEP2 vector and transfected into 293T cells for protein expression. Cell culture  
712 supernatants were collected and purified using IMAC resins.

### 713 **Protein-protein interaction identified by Octet**

714 Recombinant SARS-CoV-2 RBD-His was biotinylated and loaded onto SA sensor (Pall  
715 corporation), and then HB27 antibody or HB27 Fab fragments were added for real-time  
716 association and dissociation analysis using Octet96e (Fortebio). Data was processed  
717 with Data Analysis Octet.

### 718 **ELISA**

719 The competition between HB27 and ACE2 for binding to SARS-CoV-2 RBD, and the  
720 binding of HB27 antibody to mutant SARS-CoV-2 RBDs are examined by ELISA.  
721 Recombinant RBD protein was coated on 96-well plates using CBS buffer over night  
722 at 4°C. The plates were blocked in BSA at room temperature for 1 h. Recombinant  
723 ACE2 with an His-tag and serial diluted HB27 antibody were then added and incubated  
724 at room temperature for 1 h. After washing away the unbound proteins and antibodies,  
725 secondary antibody against His-tag with HRP labeling were added and incubated for 1  
726 h before washed away. Developing buffer was added and incubated for 5-30 min, 1%  
727 H<sub>2</sub>SO<sub>4</sub> was added to stop the reaction and absorbance at 450 nm was detected with a  
728 microplate reader. Recombinant RBD mutant proteins were coated on 96-well plates  
729 using PBS buffer at 4 °C for 12 h. After that BSA solution was used for blocking at  
730 25 °C for 1 h. Serial diluted antibodies were then added and incubated at room  
731 temperature for 1 h. After washing away the unbound antibodies, secondary antibody  
732 against human IgG with HRP labeled was added and incubated for 1 h before washed  
733 away. For color development, TMB mixture solution was added and incubated for 5-30  
734 min, then 1% H<sub>2</sub>SO<sub>4</sub> was added to stop the reaction and absorbance at 450 nm was  
735 detected with a microplate reader.

736

### 737 **Flow cytometry**

738 HB27 was serial diluted and incubated with 293T-ACE2 cells or 293T-SARS-CoV-2-S  
739 cells together with recombinant SARS-CoV-2 RBD or ACE2 for 45 min, respectively.  
740 Following the washing away of unbound proteins, cells were incubated with FITC  
741 labeled secondary antibody for 20 min and subject to flow cytometer for examination

742 of cellular binding. Data were analyzed using Flowjo and Graphpad.

### 743 **Production of pseudoviruses**

744 Pseudoviruses were prepared as previously described (Nie et al., 2020). In brief, 293T  
745 cells were transfected with the plasmids of SARS-CoV S or SARS-CoV-2 S,  
746 respectively. 24 hours later, transfected 293T cells were infected with VSV G  
747 pseudotyped virus (G\*ΔG-VSV) at a multiplicity of infection (MOI) of 4. Two hours  
748 post infection, cells were washed three times using PBS, followed by adding complete  
749 culture medium. Twenty-four hours post infection, SARS-CoV or SARS-CoV-2  
750 pseudoviruses were harvested, 0.45-μm filtered and stored at -80 °C.

### 751 **Pseudovirus neutralization assay**

752 Aliquots of a 100 μL of ~40,000 Vero-E6 cells/well were added into 96-well plates. 60  
753 μL of SARS-CoV/ SARS-CoV-2 pseudoviruses and 60 μL of serial diluted antibody  
754 samples were incubated for 1 h at 37°C, after which the pseudovirus-mAb mixtures  
755 were added into the wells containing Vero-E6 cells. The 96-well plates were then  
756 incubated for 24 hours in a 5% CO<sub>2</sub> environment at 37°C, then the luciferase  
757 luminescence (RLU) was measured using luciferase assay system following the  
758 manufacturer's manual with a luminescence microplate reader. The neutralization  
759 percentage was calculated by the formula: Inhibition (%) = [1- (sample RLU- Blank  
760 RLU)/ (Positive Control RLU-Blank RLU)] (%). Neutralization titers of the antibodies  
761 were presented as 50% maximal inhibitory concentration (IC<sub>50</sub>).

### 762 **Immunofluorescence**

763 293T cells were transfected with SARS-CoV-2-S-GFP or ACE2-GFP. 48h later, cells  
764 were fixed with 4% paraformaldehyde (PFA) for 20 min at room temperature and  
765 stained for nuclei with 4,6-diamidino-2-phenylindole (DAPI). HB27 antibody was  
766 incubated for 1h, followed by incubation of RBD-His and anti-His-PE, or APC labelled  
767 ACE2-Fc for 20 min. The fluorescence images were recorded using a Nikon A1  
768 confocal microscope.

### 769 **Liposome preparation**

770 Lipids, 1-palmitoyl-2-oleoyl-sn-glycero-3-phosphocholine (POPC; Avanti-Polar  
771 Lipids), 1,2-dioleoyl-sn-glycero-3-phospho-L-serine (DOPS; Avanti-Polar Lipids),  
772 1,2-dihexadecanoyl- sn-glycero-3-phosphoethanolamine (Texas Red-DHPE; Sigma

773 ChemicalCo.) were mixed in a 84.5:15:0.5 molar ratio and prepared as previously  
774 reported (Qiu et al., 2018). The dried lipid film was hydrated at room temperature with  
775 100 mM calcein (Sigma) in buffer (25 mM HEPES, 150 mM KCl, pH 7.4), and then  
776 the vesicles were extruded 25 times using the Mini-Extruder device (Avanti Polar  
777 Lipids) through Nuclepore filters (Whatman) with a pore size of 0.1  $\mu\text{m}$ .  
778 Unincorporated calcein was separated from the liposomes using a Sephadex G-50  
779 column. Liposomes (10 mM lipid on the basis of the input lipid) were stored at 4°C and  
780 used within 1 week.

### 781 **Liposome-binding and Calcein-leakage assays**

782 SARS-CoV-2 (~20  $\mu\text{g}$ ) was incubated with 0.1  $\mu\text{M}$  trypsin (Sigma) at 37°C for 20 min.  
783 Then the virus was mixed with 0.3  $\mu\text{M}$  ACE2 and HB27 antibody with the final  
784 concentration of 2.5  $\mu\text{M}$ , 0.5  $\mu\text{M}$ , 0.1  $\mu\text{M}$  or 0.02  $\mu\text{M}$ . The mixture was added to 0.1  
785 mM liposomes in a total volume of 90  $\mu\text{l}$  in a 96-well plate, and the fluorescence  
786 (excitation at 460 nm, emission at 509 nm) was monitored at 37 °C using a SpectraMax  
787 M5 Microplate Reader (Molecular Devices). At  $t = 0$  sec, the pH of the medium were  
788 adjusted to 5.6 by addition of 10  $\mu\text{l}$  of 1 M MES (morpholineethanesulfonic acid, pH  
789 5.6) as  $F_0$ . The emission fluorescence was recorded as  $F_t$  at 10 sec intervals. After 500  
790 sec, 10  $\mu\text{l}$  of 10% Triton X-100 was added to achieve complete release of the maximum  
791 fluorescence as  $F_{100}$ . The fusion scale was calibrated such that 0% fusion corresponded  
792 to the initial excimer fluorescence value. The percentage of calcein leakage at each time  
793 point is defined as: leakage (%) =  $(F_t - F_0) \times 100 / (F_{100} - F_0)$ .

### 794 **Cell–cell fusion assay**

795 The establishment and detection of cell–cell fusion assay was performed as previously  
796 described (Xia et al., 2020). In brief, Vero-E6 cells were used as target cells and 293T  
797 cells transfected with SARS-CoV-2 S-GFP protein expression vectors were served as  
798 effector cells. Effector cells and target cells were co-cultured in the absence or presence  
799 of antibodies in DMEM containing 10% FBS for 48 h. After incubation, cells were  
800 fixed with 4% paraformaldehyde (PFA) at room temperature for 20 min and stained for  
801 nuclei with 4,6-diamidino-2-phenylindole (DAPI). The fluorescence images were  
802 recorded using a Leica SpeII confocal microscope. S-mediated cell-cell fusion was  
803 observed by the formation of multi-nucleated syncytia. Five fields were automatically

804 collected in each well to count the number of fused and unfused cells and the antibody  
805 inhibition rate was calculated as following: fusion rate (FR) = (fused cell number) /  
806 (fused cell number+ unfused cell number), Inhibition%= (Positive Control (FR) –  
807 Sample (FR)) / (Positive Control (FR)) %. The experiment was performed three times.

### 808 **Negative stain**

809 Samples were diluted to a desired concentration (~0.02 mg/mL) and deposited onto  
810 freshly glow-discharged carbon-coated grids. After rinsing twice with deionized water,  
811 the grids were stained with 1% phosphotungstic acid (pH 7.0) and loaded onto a 120-  
812 kV transmission electron microscope (FEI) for inspection.

### 813 **Cryo-EM sample preparation and data collection**

814 HB27 Fab fragments and SARS-CoV-2 S ectodomain (1mg/ml) were purified and  
815 incubated at a ratio of 9 Fab molecules per S trimer. 3 $\mu$ L aliquots of the mixture were  
816 applied onto freshly glow-discharged C-flat R1.2/1.3 Cu grids. The grids were blotted  
817 for 3 s in 100% relative humidity for plunge-freezing (Vitrobot; FEI) in liquid ethane.  
818 The Cryo-EM data sets were collected at 300 kV with a Titan Krios microscope  
819 (Thermo Fisher) fitted with a Gatan K2 detector. Movies (32 frames, each 0.2 s, total  
820 dose 60 e<sup>-</sup>Å<sup>-2</sup>) were recorded at defocuses of between 1.25 and 2.7  $\mu$ m using SerialEM,  
821 yielding a final pixel size of 1.05 Å.

### 822 **Image processing**

823 Micrographs of SARS-CoV-2 S trimer-HB27 Fab complex were recorded. The defocus  
824 values for each micrograph was determined using Gctf (Zhang, 2016). Then particles  
825 were picked and extracted for 2D alignment and 3D classification by using the *apo*  
826 structure of SARS-CoV-2 S trimer (Walls et al., 2020) as the initial model in Relion  
827 (Scheres, 2016). The best classes were selected and used for 3D refinement and  
828 postprocessing (estimate the B-factor automatically), yielding the final resolution of 3.5  
829 Å based on the gold-standard Fourier shell correlation (threshold = 0.143) (Scheres and  
830 Chen, 2012). However, the densities for the binding interface between RBD and HB27  
831 are weak due to the conformational heterogeneity of the RBD. To solve this problems,  
832 we utilized the block-based reconstruction strategy (Wang et al., 2020; Wang et al.,  
833 2019; Yang et al., 2020) for focusing classification and refinement. Details on parameter  
834 settings can be found in structural determinations for the binding interface between

835 RBD and H014 (Zhe Lv, 2020). In addition, local averaging of the RBD-Fab equivalent  
836 copies present in different classes further improves the resolution to 3.9 Å. All  
837 procedures were performed with Relion (Scheres, 2016). The local resolution was  
838 evaluated by ResMap (Kucukelbir et al., 2014).

### 839 **Model building and refinement**

840 The structures of SARS-CoV-2 S trimer and a human Fab fragment (Protein Data Bank  
841 ID: 6VSB and 5N4J, respectively) were manually fitted into the refined map of SARS-  
842 CoV-2 S trimer-HB27 complex in Chimera (Pettersen et al., 2004) and then improved  
843 by manual real-space refinement in COOT (Brown et al., 2015). The atomic model was  
844 further subject to real-space positional and B-factor refinement using Phenix (Afonine  
845 et al., 2012). The final models were evaluated using Molprobity (Chen et al., 2010).  
846 Detailed informatin of the data sets and refinement statistics are summarized in Table  
847 S2.

### 848 **Surface plasmon resonance**

849 The SARS-CoV-2 S trimer was immobilized onto a CM5 sensor to ~500 response units  
850 (RUs) using Biacore 8K (GE Healthcare). Serial diluted HB27 or Fab fragments or  
851 recombinant ACE2 flowed through the sensor. For competitive binding assays, the first  
852 sample was allowed to flow over the chip at a rate of 20 µl/min for 120 s, and then the  
853 second sample was injected at the same rate for another 120 s. The response units were  
854 recorded and analyzed.

### 855 **Plaque reduction neutralization tests (PRNT)**

856 The neutralization activity of HB27 against SARS-CoV-2 were examined by standard  
857 plaque reduction neutralization tests (PRNT) in Vero cells. In brief, 5-fold serial  
858 dilutions of HB27 were mixed with ~100 PFU of SARS-CoV-2 and incubated at 37 °C  
859 for 1 hour. The mixture was then added to Vero-E6 cell monolayers in a 12-well plate  
860 in duplicate and incubated at 37 °C for 1 hour. After which the mixture was removed,  
861 and 1 ml of 1.0% (w/v) LMP agarose (Promega) in DMEM supplemented with 4% (v/v)  
862 FBS was layered onto the infected cells. Following a two-day incubation at 37 °C, the  
863 wells were stained with 1% (w/v) crystal violet in 4% (v/v) formaldehyde for plaque  
864 visualization. The PRNT<sub>50</sub> values were determined using non-linear regression analysis  
865 with GraphPad prism.



## 866 **Protection against SARS-CoV-2 challenge in hACE2 mice**

867 The *in vivo* protection efficacy of HB27 antibody was evaluated using a newly  
868 established mouse model based on a SARS-CoV-2 mouse adapted strain MASCP6 (Gu  
869 et al., 2020) and a humanized hACE2 mouse model (Sun et al., 2020), respectively.  
870 Briefly, a group of 6 to 8-week-old hACE2 humanized mice or BALB/c mice were  
871 intraperitoneally administrated with HB27 (20 mg/kg) before (prophylactic) and/or  
872 after (therapeutic) challenge with  $5 \times 10^5$  PFU of SARS-CoV-2 or  $1.6 \times 10^4$  PFU of  
873 MASCP6 via intranasal route, respectively. All mice were monitored daily for  
874 morbidity and mortality. The lung tissues of mice were collected at 3 and 5 dpi for viral  
875 RNA loads assay and HE staining.

## 876 **Viral RNA quantitation**

877 Viral RNA quantification was performed by RT-qPCR applying One Step PrimeScript  
878 RT-PCR Kit (Takara, Japan). The primers and probe targeting against the gene of  
879 SARS-CoV-2 S used for RT-qPCR were CoV-F3 (5'-TCCTGGTGATTCTT  
880 CTTCAGGT-3'); CoV-R3 (5'-TCTGAGAGAGGGTCAAGTGC-3'); and CoV-P3 (5'-  
881 FAM-AGCTGCAGCACCAGCTGTCCA -BHQ1-3'), respectively.

## 882 **Pre- and post-adsorption inhibition assay**

883 Pre- and post-adsorption inhibition assays were performed as described previously  
884 (Wang et al., 2017). For the post-adsorption assay, SARS-CoV-2 was first added to Vero  
885 cells for 1 hour at 4 °C, and then the cells were washed three times, following which  
886 the mAb was added and incubated for 1 hour at 4 °C. For the pre-adsorption assay, the  
887 mAb was firstly incubated with SARS-CoV-2 for 1 hour at 4 °C before the mAb-virus  
888 mixture was added to Vero cells. After three washes using PBS, the PRNT was  
889 performed as described above. And the detection of the remaining amount of SARS-  
890 CoV-2 RNA on the surface of Vero cells after HB27 treatment was carried out with  
891 quantitative RT-PCR.

## 892 **Histology and Immunostaining**

893 Mouse tissues were excised and fixed with 10% neutral buffered formaline, and then  
894 dehydrated and embedded in paraffin. Sections of 4 µm thickness were obtained and  
895 stained with hematoxylin and eosin (H & E) following standard histological procedures.  
896 Images were recorded using Olympus BX51 microscope equipped with a DP72 camera.

## 897 **Toxicokinetics of HB27 in Rhesus Monkeys**

898 Rhesus macaques were randomly grouped into two groups, one group was given  
899 placebo and one group was given a single dose of HB27 at 500 mg/kg intravenously.  
900 Blood samples were collected at pre-dose, immediately after completion of dosing ( $\pm$  1  
901 minute), and 1h, 2h, 4 h, 8 h, 24 h (Day 2), 48 h (Day 3), 72(Day4), 120 h (Day 6), 168  
902 h (Day 8) and 336 h (Day 15) after beginning of infusion. Serum concentration of HB27  
903 was measured using ELISA.

## 904 **Clinical pathology of HB27 in Rhesus Monkeys**

905 Blood samples were collected via forelimb or hindlimb subcutaneous vein at predose  
906 and 3, 8 and 16 days postdose. Hematology parameters including white blood cells  
907 (WBC), lymphocytes (Lymph), red blood cells (RBC) and hemoglobin concentration  
908 (HGB) were measured using an ADVIA Hematology system. Clinical chemistry  
909 parameters including AST (aspartate transaminase), ALT (alanine transaminase) and  
910 ALP (alkaline phosphatase) and LDH (lactate dehydrogenase) were measured using  
911 TBA-120FR. BD FACS Calibur Flow Cytometry was used for determinations of CD4+,  
912 CD8+ T percentages.

913

## 914 **References and Notes**

- 915 Afonine, P.V., Grosse-Kunstleve, R.W., Echols, N., Headd, J.J., Moriarty, N.W., Mustyakimov, M.,  
916 Terwilliger, T.C., Urzhumtsev, A., Zwart, P.H., and Adams, P.D. (2012). Towards automated  
917 crystallographic structure refinement with phenix. refine. *Acta Crystallographica Section D:*  
918 *Biological Crystallography* *68*, 352-367.
- 919 Brouwer, P.J.M., Caniels, T.G., van der Straten, K., Snitselaar, J.L., Aldon, Y., Bangaru, S., Torres, J.L.,  
920 Okba, N.M.A., Claireaux, M., Kerster, G., *et al.* (2020). Potent neutralizing antibodies from COVID-  
921 19 patients define multiple targets of vulnerability. *Science*.
- 922 Brown, A., Long, F., Nicholls, R.A., Toots, J., Emsley, P., and Murshudov, G. (2015). Tools for  
923 macromolecular model building and refinement into electron cryo-microscopy reconstructions.  
924 *Acta Crystallographica Section D-Structural Biology* *71*, 136-153.
- 925 Cao, Y., Su, B., Guo, X., Sun, W., Deng, Y., Bao, L., Zhu, Q., Zhang, X., Zheng, Y., Geng, C., *et al.*  
926 (2020). Potent neutralizing antibodies against SARS-CoV-2 identified by high-throughput single-  
927 cell sequencing of convalescent patients' B cells. *Cell*.
- 928 Chen, V.B., Arendall, W.B., Headd, J.J., Keedy, D.A., Immormino, R.M., Kapral, G.J., Murray, L.W.,  
929 Richardson, J.S., and Richardson, D.C. (2010). MolProbity: all-atom structure validation for  
930 macromolecular crystallography. *Acta Crystallographica Section D: Biological Crystallography* *66*,  
931 12-21.
- 932 Corti, D., Zhao, J., Pedotti, M., Simonelli, L., Agnihothram, S., Fett, C., Fernandez-Rodriguez, B.,  
933 Foglierini, M., Agatic, G., Vanzetta, F., *et al.* (2015). Prophylactic and postexposure efficacy of a

934 potent human monoclonal antibody against MERS coronavirus. Proceedings of the National  
935 Academy of Sciences of the United States of America *112*, 10473-10478.

936 Du, L., He, Y., Zhou, Y., Liu, S., Zheng, B.J., and Jiang, S. (2009). The spike protein of SARS-CoV--a  
937 target for vaccine and therapeutic development. Nature reviews Microbiology *7*, 226-236.

938 Gallagher, T.M., and Buchmeier, M.J. (2001). Coronavirus spike proteins in viral entry and  
939 pathogenesis. Virology *279*, 371-374.

940 Gao, Q., Bao, L., Mao, H., Wang, L., Xu, K., Yang, M., Li, Y., Zhu, L., Wang, N., Lv, Z., *et al.* (2020).  
941 Rapid development of an inactivated vaccine candidate for SARS-CoV-2. Science.

942 Gu, H., Chen, Q., Yang, G., He, L., Fan, H., Deng, Y.-Q., Wang, Y., Teng, Y., Zhao, Z., Cui, Y., *et al.*  
943 (2020). Rapid adaptation of SARS-CoV-2 in BALB/c mice: Novel mouse model for vaccine efficacy.  
944 bioRxiv, 2020.2005.2002.073411.

945 Gui, M., Song, W., Zhou, H., Xu, J., Chen, S., Xiang, Y., and Wang, X. (2017). Cryo-electron  
946 microscopy structures of the SARS-CoV spike glycoprotein reveal a prerequisite conformational  
947 state for receptor binding. Cell research *27*, 119-129.

948 Hansen, J., Baum, A., Pascal, K.E., Russo, V., Giordano, S., Wloga, E., Fulton, B.O., Yan, Y., Koon, K.,  
949 Patel, K., *et al.* (2020). Studies in humanized mice and convalescent humans yield a SARS-CoV-2  
950 antibody cocktail. Science.

951 Hoffmann, M., Kleine-Weber, H., Schroeder, S., Kruger, N., Herrler, T., Erichsen, S., Schiergens, T.S.,  
952 Herrler, G., Wu, N.H., Nitsche, A., *et al.* (2020). SARS-CoV-2 Cell Entry Depends on ACE2 and  
953 TMPRSS2 and Is Blocked by a Clinically Proven Protease Inhibitor. Cell *181*, 271-280 e278.

954 Kirchdoerfer, R.N., Cottrell, C.A., Wang, N., Pallesen, J., Yassine, H.M., Turner, H.L., Corbett, K.S.,  
955 Graham, B.S., McLellan, J.S., and Ward, A.B. (2016). Pre-fusion structure of a human coronavirus  
956 spike protein. Nature *531*, 118-121.

957 Korber, B., Fischer, W., Gnanakaran, S.G., Yoon, H., Theiler, J., Abfalterer, W., Foley, B., Giorgi, E.E.,  
958 Bhattacharya, T., and Parker, M.D. (2020). Spike mutation pipeline reveals the emergence of a more  
959 transmissible form of SARS-CoV-2. bioRxiv : the preprint server for biology.

960 Kucukelbir, A., Sigworth, F.J., and Tagare, H.D. (2014). Quantifying the local resolution of cryo-EM  
961 density maps. Nature methods *11*, 63-65.

962 Li, F. (2016). Structure, Function, and Evolution of Coronavirus Spike Proteins. Annual review of  
963 virology *3*, 237-261.

964 Lu, R., Zhao, X., Li, J., Niu, P., Yang, B., Wu, H., Wang, W., Song, H., Huang, B., Zhu, N., *et al.* (2020).  
965 Genomic characterisation and epidemiology of 2019 novel coronavirus: implications for virus  
966 origins and receptor binding. Lancet *395*, 565-574.

967 Nie, J., Li, Q., Wu, J., Zhao, C., Hao, H., Liu, H., Zhang, L., Nie, L., Qin, H., Wang, M., *et al.* (2020).  
968 Establishment and validation of a pseudovirus neutralization assay for SARS-CoV-2. Emerging  
969 microbes & infections *9*, 680-686.

970 Ou, X., Liu, Y., Lei, X., Li, P., Mi, D., Ren, L., Guo, L., Guo, R., Chen, T., Hu, J., *et al.* (2020).  
971 Characterization of spike glycoprotein of SARS-CoV-2 on virus entry and its immune cross-  
972 reactivity with SARS-CoV. Nature communications *11*, 1620.

973 Pallesen, J., Wang, N., Corbett, K.S., Wrapp, D., Kirchdoerfer, R.N., Turner, H.L., Cottrell, C.A., Becker,  
974 M.M., Wang, L., Shi, W., *et al.* (2017). Immunogenicity and structures of a rationally designed  
975 prefusion MERS-CoV spike antigen. Proceedings of the National Academy of Sciences of the  
976 United States of America *114*, E7348-E7357.

977 Pettersen, E.F., Goddard, T.D., Huang, C.C., Couch, G.S., Greenblatt, D.M., Meng, E.C., and Ferrin,

978 T.E. (2004). UCSF Chimera—a visualization system for exploratory research and analysis. *Journal*  
979 *of computational chemistry* *25*, 1605-1612.

980 Pinto, D., Park, Y.J., Beltramello, M., Walls, A.C., Tortorici, M.A., Bianchi, S., Jaconi, S., Culap, K., Zatta,  
981 F., De Marco, A., *et al.* (2020). Cross-neutralization of SARS-CoV-2 by a human monoclonal SARS-  
982 CoV antibody. *Nature*.

983 Qiu, X., Lei, Y., Yang, P., Gao, Q., Wang, N., Cao, L., Yuan, S., Huang, X., Deng, Y., Ma, W., *et al.*  
984 (2018). Structural basis for neutralization of Japanese encephalitis virus by two potent therapeutic  
985 antibodies. *Nature microbiology* *3*, 287-294.

986 Scheres, S.H. (2016). Processing of Structurally Heterogeneous Cryo-EM Data in RELION. *Methods*  
987 *in enzymology* *579*, 125-157.

988 Scheres, S.H., and Chen, S. (2012). Prevention of overfitting in cryo-EM structure determination.  
989 *Nature methods* *9*, 853-854.

990 Shang, J., Wan, Y., Luo, C., Ye, G., Geng, Q., Auerbach, A., and Li, F. (2020). Cell entry mechanisms  
991 of SARS-CoV-2. *Proceedings of the National Academy of Sciences of the United States of America*  
992 *117*, 11727-11734.

993 Shi, R., Shan, C., Duan, X., Chen, Z., Liu, P., Song, J., Song, T., Bi, X., Han, C., Wu, L., *et al.* (2020). A  
994 human neutralizing antibody targets the receptor binding site of SARS-CoV-2. *Nature*.

995 Sun, S.H., Chen, Q., Gu, H.J., Yang, G., Wang, Y.X., Huang, X.Y., Liu, S.S., Zhang, N.N., Li, X.F., Xiong,  
996 R., *et al.* (2020). A Mouse Model of SARS-CoV-2 Infection and Pathogenesis. *Cell host & microbe*.

997 Walls, A.C., Park, Y.J., Tortorici, M.A., Wall, A., McGuire, A.T., and Veelsler, D. (2020). Structure,  
998 Function, and Antigenicity of the SARS-CoV-2 Spike Glycoprotein. *Cell* *181*, 281-292 e286.

999 Walls, A.C., Tortorici, M.A., Snijder, J., Xiong, X., Bosch, B.J., Rey, F.A., and Veelsler, D. (2017).  
1000 Tectonic conformational changes of a coronavirus spike glycoprotein promote membrane fusion.  
1001 *Proceedings of the National Academy of Sciences of the United States of America* *114*, 11157-  
1002 11162.

1003 Walls, A.C., Xiong, X., Park, Y.J., Tortorici, M.A., Snijder, J., Quispe, J., Cameroni, E., Gopal, R., Dai,  
1004 M., Lanzavecchia, A., *et al.* (2019). Unexpected Receptor Functional Mimicry Elucidates Activation  
1005 of Coronavirus Fusion. *Cell* *176*, 1026-1039 e1015.

1006 Wang, N., Chen, W., Zhu, L., Zhu, D., Feng, R., Wang, J., Zhu, B., Zhang, X., Chen, X., Liu, X., *et al.*  
1007 (2020). Structures of the portal vertex reveal essential protein-protein interactions for Herpesvirus  
1008 assembly and maturation. *Protein & cell* *11*, 366-373.

1009 Wang, N., Zhao, D., Wang, J., Zhang, Y., Wang, M., Gao, Y., Li, F., Wang, J., Bu, Z., Rao, Z., *et al.*  
1010 (2019). Architecture of African swine fever virus and implications for viral assembly. *Science* *366*,  
1011 640-644.

1012 Wang, X., Zhu, L., Dang, M., Hu, Z., Gao, Q., Yuan, S., Sun, Y., Zhang, B., Ren, J., Kotecha, A., *et al.*  
1013 (2017). Potent neutralization of hepatitis A virus reveals a receptor mimic mechanism and the  
1014 receptor recognition site. *Proceedings of the National Academy of Sciences of the United States*  
1015 *of America* *114*, 770-775.

1016 Wec, A.Z., Wrapp, D., Herbert, A.S., Maurer, D.P., Haslwanter, D., Sakharkar, M., Jangra, R.K.,  
1017 Dieterle, M.E., Lilov, A., Huang, D., *et al.* (2020). Broad neutralization of SARS-related viruses by  
1018 human monoclonal antibodies. *Science*.

1019 Wrapp, D., Wang, N., Corbett, K.S., Goldsmith, J.A., Hsieh, C.L., Abiona, O., Graham, B.S., and  
1020 McLellan, J.S. (2020). Cryo-EM structure of the 2019-nCoV spike in the prefusion conformation.  
1021 *Science* *367*, 1260-1263.

1022 Wu, Y., Wang, F., Shen, C., Peng, W., Li, D., Zhao, C., Li, Z., Li, S., Bi, Y., Yang, Y., *et al.* (2020). A  
1023 noncompeting pair of human neutralizing antibodies block COVID-19 virus binding to its receptor  
1024 ACE2. *Science*.

1025 Xia, S., Liu, M., Wang, C., Xu, W., Lan, Q., Feng, S., Qi, F., Bao, L., Du, L., Liu, S., *et al.* (2020). Inhibition  
1026 of SARS-CoV-2 (previously 2019-nCoV) infection by a highly potent pan-coronavirus fusion  
1027 inhibitor targeting its spike protein that harbors a high capacity to mediate membrane fusion. *Cell*  
1028 *research* *30*, 343-355.

1029 Yang, Y., Yang, P., Wang, N., Chen, Z., Su, D., Zhou, Z.H., Rao, Z., and Wang, X. (2020). Architecture  
1030 of the herpesvirus genome-packaging complex and implications for DNA translocation. *Protein &*  
1031 *cell* *11*, 339-351.

1032 Yuan, M., Wu, N.C., Zhu, X., Lee, C.D., So, R.T.Y., Lv, H., Mok, C.K.P., and Wilson, I.A. (2020). A highly  
1033 conserved cryptic epitope in the receptor binding domains of SARS-CoV-2 and SARS-CoV.  
1034 *Science* *368*, 630-633.

1035 Zhang, K. (2016). Gctf: Real-time CTF determination and correction. *Journal of structural biology*  
1036 *193*, 1-12.

1037 Zhe Lv, Y.-Q.D., Qing Ye, Lei Cao, Chun-Yun Sun, Changfa Fan, Weijin Huang, Shihui Sun, Yao Sun,  
1038 Ling Zhu, Qi Chen, Nan Wang, Jianhui Nie, Zhen Cui, Dandan Zhu, Neil Shaw, Xiao-Feng Li,  
1039 Qianqian Li, Liangzhi Xie, Youchun Wang, Zihe Rao, Cheng-Feng Qin, Xiangxi Wang (2020).  
1040 Structural basis for neutralization of SARS-CoV-2 and SARS-CoV by a potent therapeutic antibody.  
1041 *Science*.

1042 Zhou, P., Yang, X.L., Wang, X.G., Hu, B., Zhang, L., Zhang, W., Si, H.R., Zhu, Y., Li, B., Huang, C.L., *et*  
1043 *al.* (2020). A pneumonia outbreak associated with a new coronavirus of probable bat origin. *Nature*  
1044 *579*, 270-273.

1045 Zost, S.J., Gilchuk, P., Case, J.B., Binshtein, E., Chen, R.E., Nkolola, J.P., Schafer, A., Reidy, J.X., Trivette,  
1046 A., Nargi, R.S., *et al.* (2020). Potently neutralizing and protective human antibodies against SARS-  
1047 CoV-2. *Nature* *584*, 443-449.

1048

1049

1050

1051

1052

1053

1054

1055

1056

1057

1058

1059

1060

1061

1062

1063

1064

1065

1066 Supplemental Information for

1067

1068 **Double Lock of a Potent Human Monoclonal Antibody against**

1069 **SARS-CoV-2**

1070

1071 Ling Zhu<sup>1,10</sup>, Yong-Qiang Deng<sup>2,10</sup>, Rong-Rong Zhang<sup>2,10</sup>, Zhen Cui<sup>1,10</sup>, Chun-Yun Sun<sup>3,10</sup>, Chang-

1072 Fa Fan<sup>4,10</sup>, Xiaorui Xing<sup>1,9,10</sup>, Weijin Huang<sup>5</sup>, Qi Chen<sup>2</sup>, Na-Na Zhang<sup>2</sup>, Qing Ye<sup>2</sup>, Tian-Shu Cao<sup>2</sup>,

1073 Nan Wang<sup>1</sup>, Lei Wang<sup>1</sup>, Lei Cao<sup>1</sup>, Huiyu Wang<sup>3</sup>, Desheng Kong<sup>3</sup>, Juan Ma<sup>3</sup>, Chunxia Luo<sup>3</sup>,

1074 Yanjing Zhang<sup>3</sup>, Jianhui Nie<sup>5</sup>, Yao Sun<sup>1</sup>, Zhe Lv<sup>1</sup>, Neil Shaw<sup>1</sup>, Qianqian Li<sup>5</sup>, Xiao-Feng Li<sup>2</sup>, Junjie

1075 Hu<sup>1</sup>, Liangzhi Xie<sup>3,6,7\*</sup>, Zihao Rao<sup>1\*</sup>, Youchun Wang<sup>5\*</sup>, Xiangxi Wang<sup>1,8,11\*</sup> and Cheng-Feng Qin<sup>2\*</sup>

1076

1077

1078

1079

1080

1081 **This PDF file includes:**

1082 **Figures S1 to S7**

1083 **Tables S1 to S3**

1084

1085

1086

1087

1088

1089

1090

1091

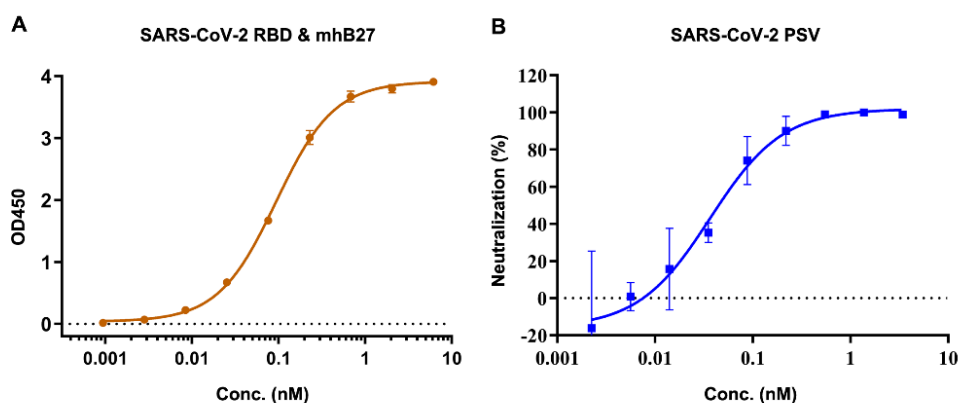

1092

1093

1094 **Figure S1 Murine antibody mhB27 strongly binds SARS-CoV-2 RBD and**  
1095 **neutralizes SARS-CoV-2 PSV. Related to Figure 1.**

1096 (A) Binding assay of mhB27 to SARS-CoV-2 RBD. mhB27 was serial diluted and  
1097 tested its ability to bind to SARS-CoV-2 RBD by ELISA.

1098 (B) Neutralizing activities of mhB27 against SARS-CoV-2 pseudoviruses (PSV).

1099

1100

1101

1102

1103

1104

1105

1106

1107

1108

1109

1110

1111

1112

1113

1114

1115

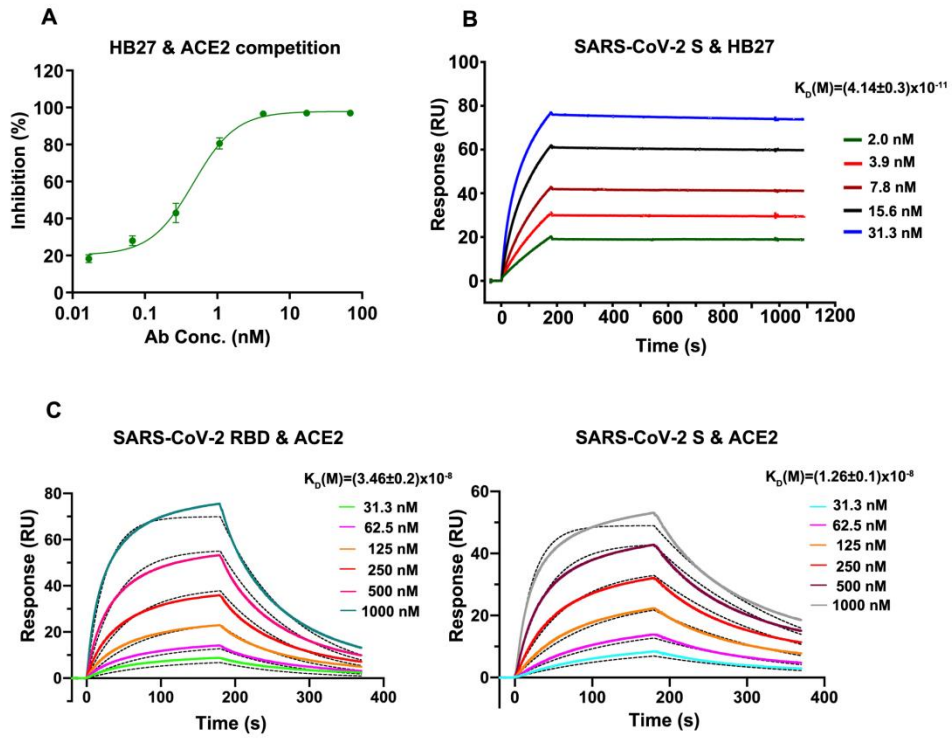

**D**

|                     |   |      |                 |   |
|---------------------|---|------|-----------------|---|
| SARS-CoV-2 RBD-His: | + | +    | +               | - |
| Anti-His-PE:        | + | +    | +               | + |
| Ab:                 | - | HB27 | Isotype control | - |

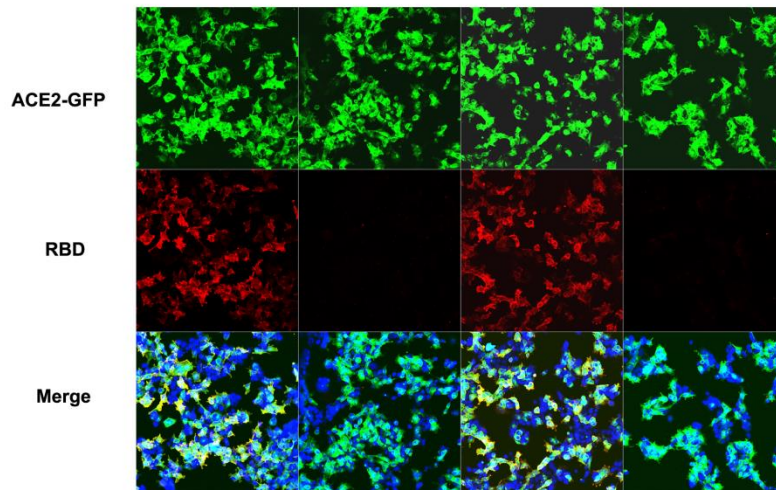

1116  
1117  
1118  
1119  
1120  
1121  
1122



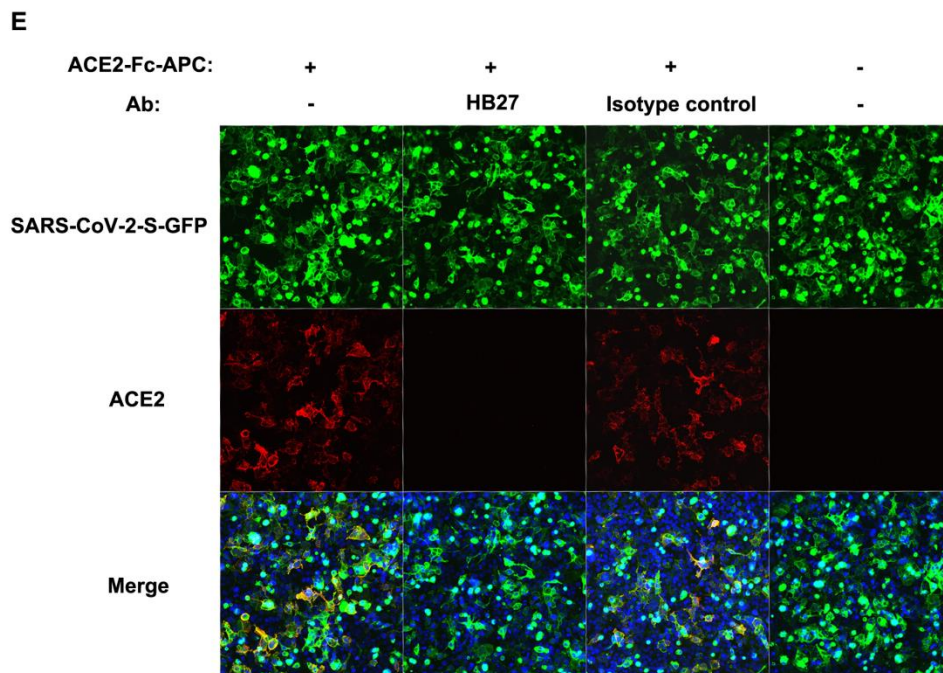

1123

1124 **Figure S2 HB27 potently competes with ACE2 for binding to SARS-CoV-2 RBD.**

1125 **Related to Figure 4.**

1126 (A) HB27 was demonstrated to compete with recombinant ACE2 for binding to SARS-  
1127 CoV-2 RBD with an  $EC_{50}$  value of 0.5 nM by the enzyme-linked immunosorbent assay  
1128 (ELISA).

1129 (B) BIAcore SPR kinetic profile of SARS-CoV-2 S trimer and HB27. The binding  
1130 affinity  $K_D$  (equilibrium dissociation constant,  $K_D = K_d/K_a$ , where  $K_d$  and  $K_a$  represent  
1131 the dissociation rate constant and association rate constant, respectively) values were  
1132 obtained using a series of HB27 concentrations and fitted in a global mode in each  
1133 sensorgram.

1134 (C) BIAcore SPR kinetic profiles of SARS-CoV-2 RBD (left panel) and S trimer (right  
1135 panel) with ACE2. The binding affinity  $K_D$  (equilibrium dissociation constant,  $K_D =$   
1136  $K_d/K_a$ , where  $K_d$  and  $K_a$  represent the dissociation rate constant and association rate  
1137 constant, respectively) values were obtained using a series of HB27 concentrations and  
1138 fitted in a global mode in each sensorgram.

1139 (D) Competition of HB27 for SARS-CoV-2 RBD binding to 293T cells expressing  
1140 GFP-tagged ACE2 as detected by immunofluorescence assay, scale bar, 100  $\mu$ m. Anti-

1141 H7N9 mAb was used as an isotype control.

1142 (E) Competition of HB27 for ACE2-Fc-Apc binding to 293T cells expressing GFP-

1143 tagged SARS-CoV-2-Spike as detected by immunofluorescence assay. Anti-H7N9

1144 mAb was used as an isotype control.

1145

1146

1147

1148

1149

1150

1151

1152

1153

1154

1155

1156

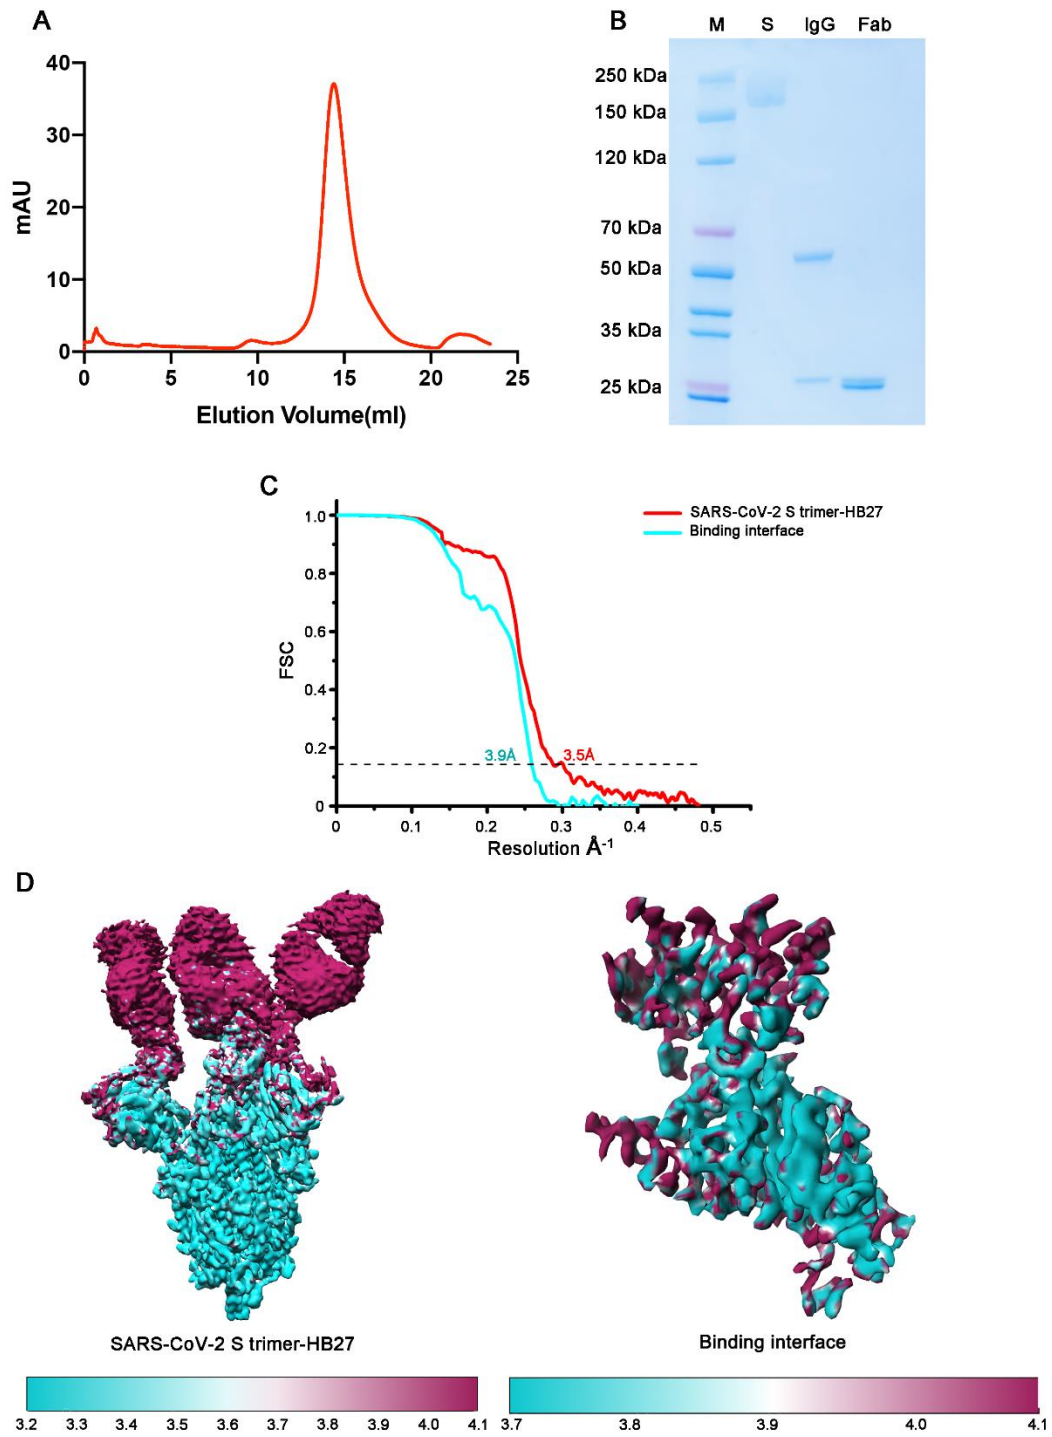

1157

1158

1159

1160

1161

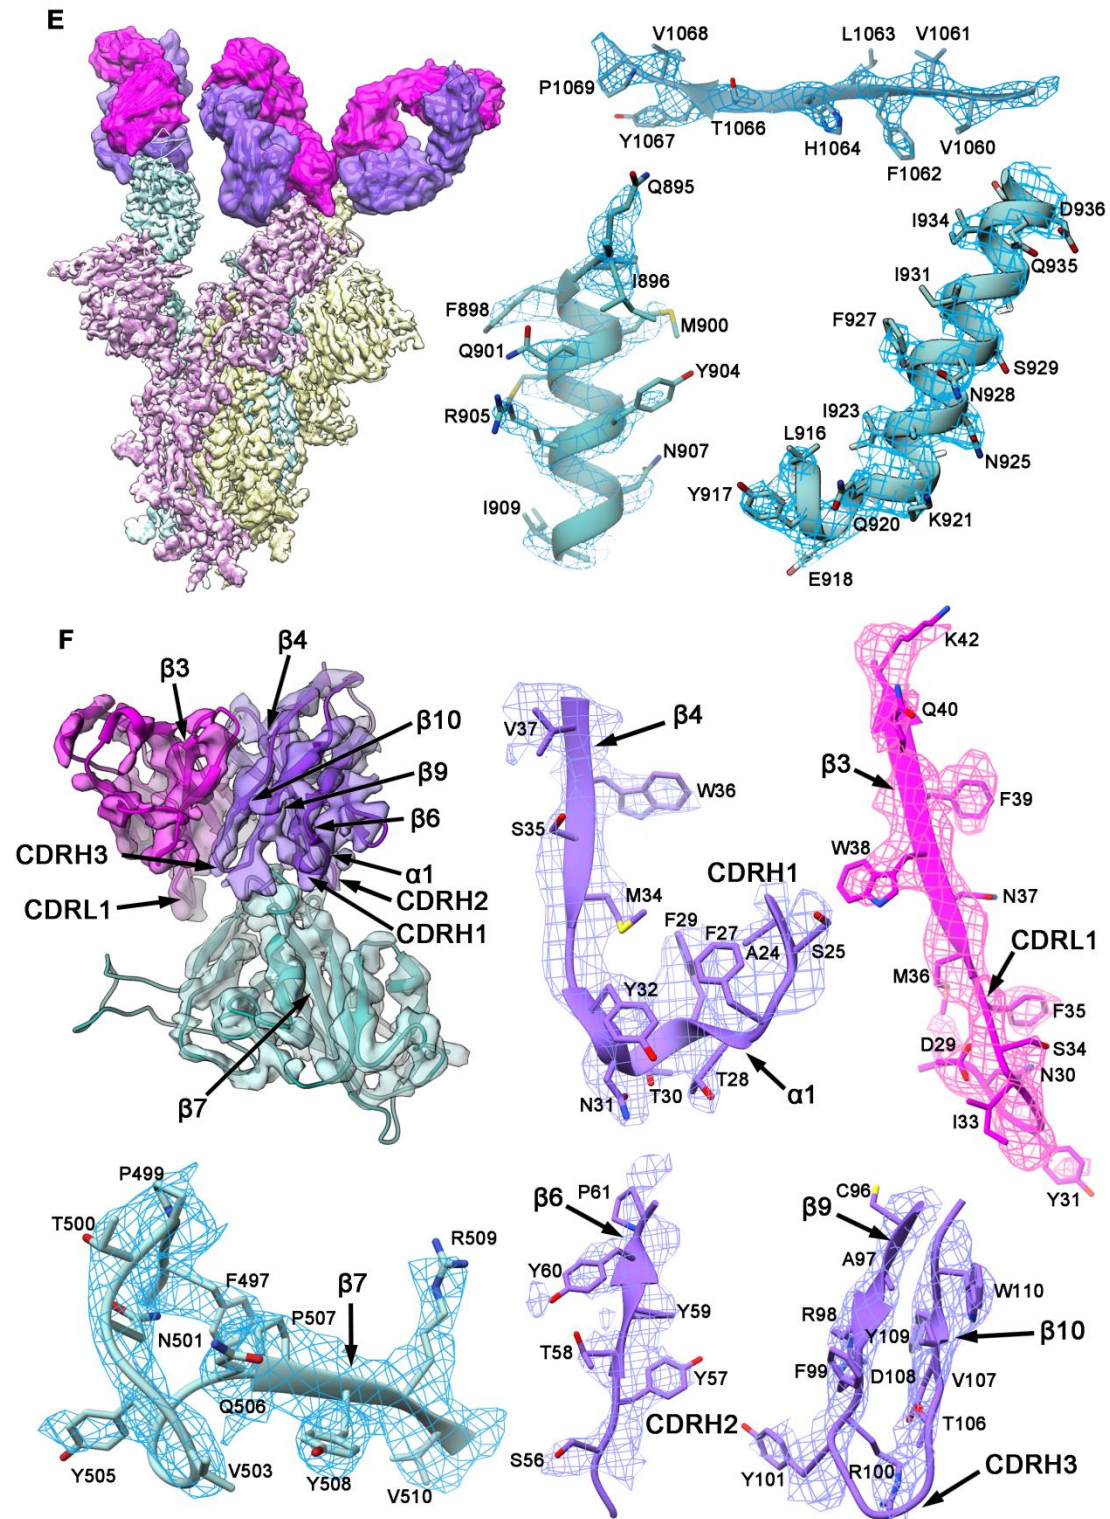

1168 fragment.

1169 (C) The gold-standard Fourier Shell Correlation (FSC) curves of the final cryo-EM  
1170 maps of the SARS-CoV-2 S trimer-HB27 Fabs complex and of the binding interface.

1171 (D) Local resolution evaluations of the cryo-EM maps of SARS-CoV-2 S trimer  
1172 complexed with three HB27 Fabs and the binding interface using ResMap ([Kucukelbir  
1173 et al., 2014](#)) are shown.

1174 (E) Cryo-EM map of SARS-CoV-2 S trimer complexed with three HB27 Fabs.

1175 (F) Cryo-EM map of the binding interface between SARS-CoV-2 RBD and one HB27  
1176 Fab. The color scheme is the same as in Figure 6. The magnified panels illustrate both  
1177 maps (mesh) and related atomic models. Residues are shown as sticks,

1178

1179

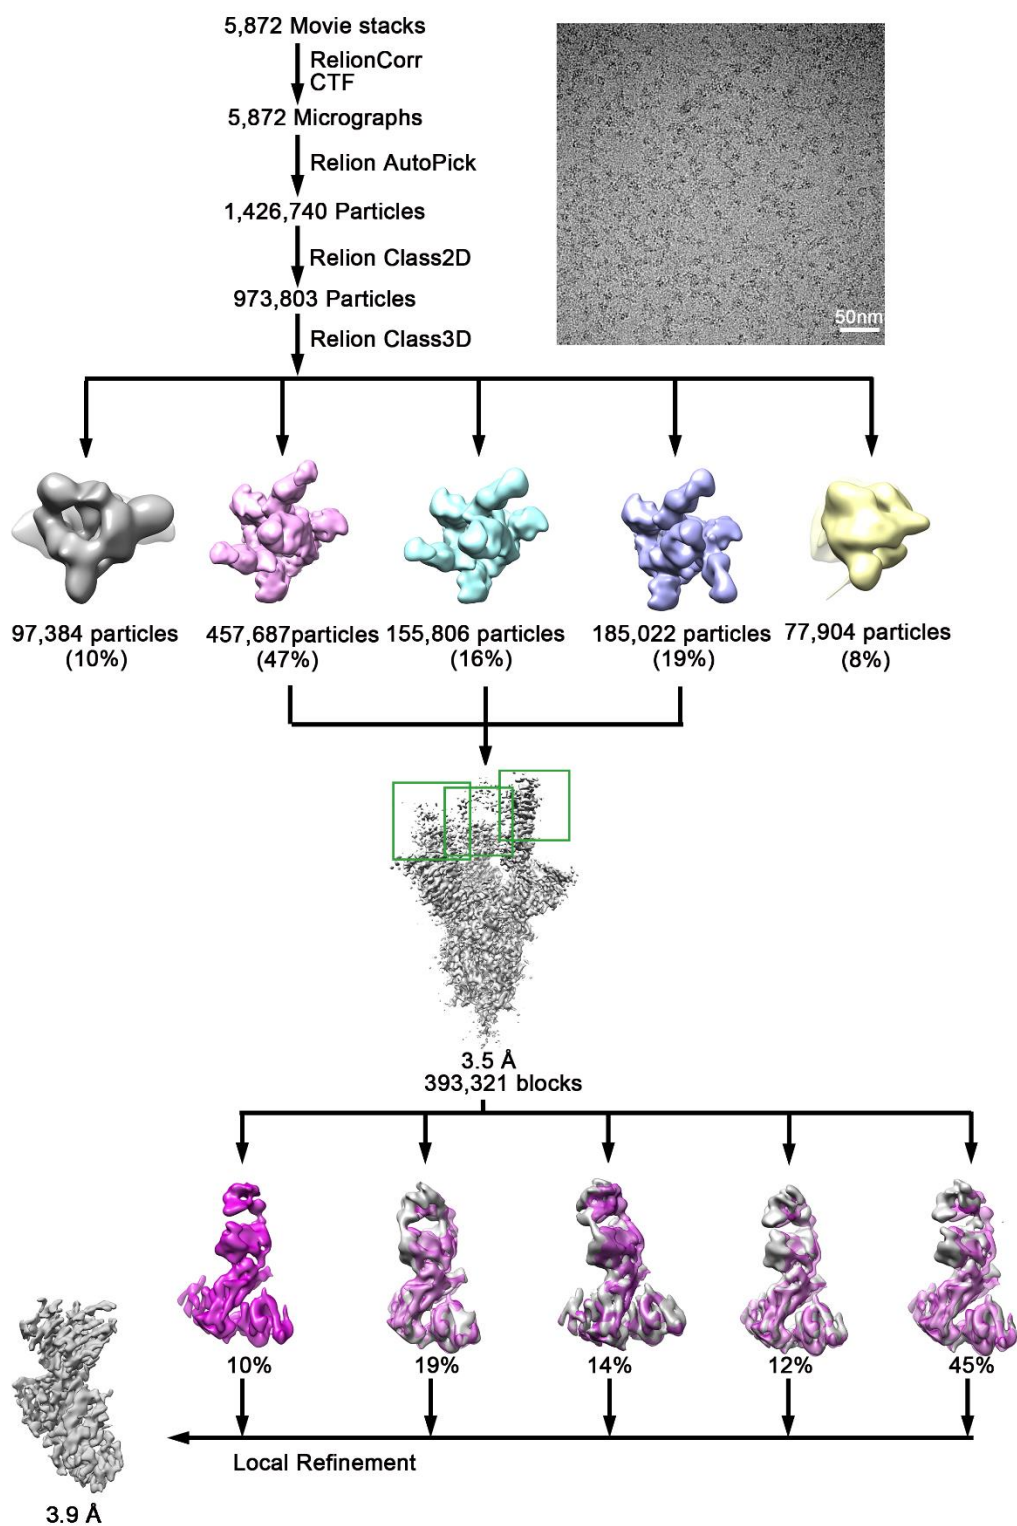

1180

1181 **Figure S4 Flowchart of Cryo-EM data processing of SARS-CoV-2 S trimer and**  
1182 **HB27 complex. Related to Figure 6.**

1183

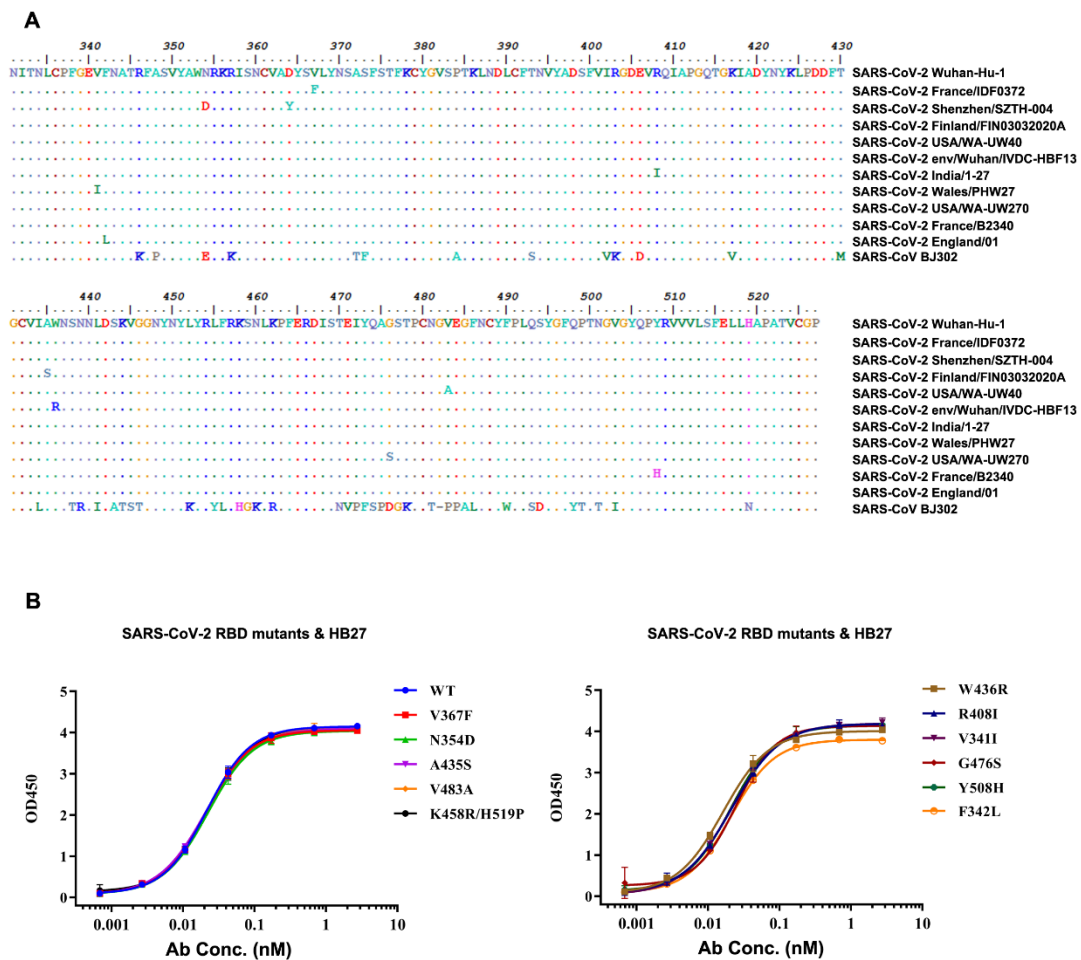

1184 **Figure S5 HB27 strongly binds various SARS-CoV-2 RBD mutants. Related to**  
 1185 **Figure 6.**

1186 (A) Sequence alignments of the mutated RBDs of circulating SARS-CoV-2 strains used  
 1187 in (A) and SARS-CoV. The genome sequences used in the alignments were downloaded  
 1188 from NCBI and GISAID with accession numbers: NC\_045512.2, EPI\_ISL\_406596,  
 1189 EPI\_ISL\_406595, EPI\_ISL\_413602, EPI\_ISL\_415605, EPI\_ISL\_408511,  
 1190 EPI\_ISL\_413522, EPI\_ISL\_415655, EPI\_ISL\_418055, EPI\_ISL\_416507,  
 1191 EPI\_ISL\_407071 and AY429078.1, respectively. The alignments were analyzed by  
 1192 Clustal W and BioEdit.

1193 (B) ELISA binding assays of HB27 with selected SARS-CoV-2 RBD mutants. SARS-  
 1194 CoV-2 RBD proteins with previously reported site mutations were examined for their  
 1195 binding abilities to HB27.

1196  
 1197

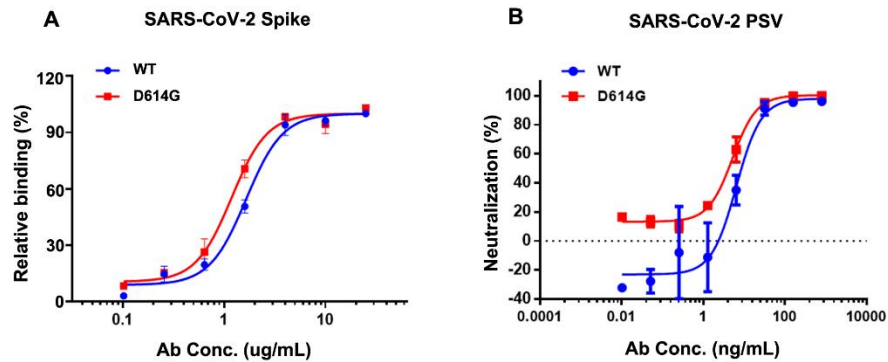

1198

1199 **Figure S6 HB27 potently binds and neutralizes SARS-CoV-2 wide type and**  
1200 **mutant strain D614G. Related to Figure 7.**

1201 (A) The spike proteins of WT and D614G were transiently expressed in 293T cells which  
1202 were then examined for binding to HB27 by flow cytometry.

1203 (B) Neutralizing activities of HB27 against SARS-CoV-2 WT and D614G  
1204 pseudoviruses (PSV).

1205

1206

1207

1208



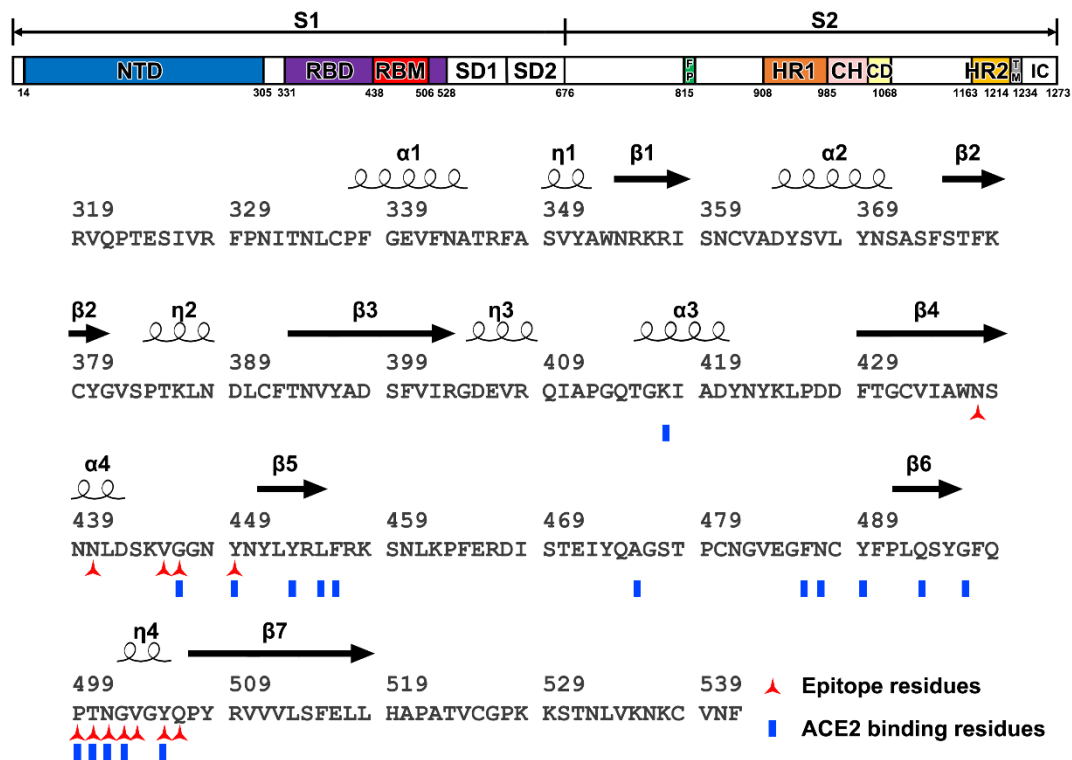

1209

1210 **Figure S7 Schematic diagram of SARS-CoV-2 S and the secondary structure of**  
 1211 **the RBD. Related to Figure 7.**

1212 (A) Overall topology of SARS-CoV-2 S. NTD: N-terminal domain; RBD: receptor-  
 1213 binding domain; RBM: receptor-binding motif; SD1: subdomain 1; SD2: subdomain 2;  
 1214 FP: fusion peptide; HR1: heptad repeat 1; HR2: heptad repeat 2; TM: transmembrane  
 1215 region; IC: intracellular domain.

1216 (B) Protein sequence and the secondary structure of SARS-CoV-2 RBD. The red three-  
 1217 pointed stars and blue rectangles mark the residues in SARS-CoV-2 S RBD that interact  
 1218 with HB27 and ACE2, respectively.

1219

1220

1221

1222

1223

1224

1225

1226

1227

1228

1229

1230

1231

1232 **Table S1. Mean toxicokinetic parameters after intravenous injection of 500 mg/kg**  
1233 **HB27 into Rhesus Monkey (0-336 h, n=2, mean  $\pm$  SD). Related to Figure 3.**

1234

| Sex             | Parameters | $t_{1/2}$<br>(h) | $C_{max}$<br>(mg/mL) | $AUC_{last}$<br>(h*mg/mL) | Vd<br>(mL/Kg) | Cl<br>(mL/h/Kg) | MRT<br>(h) |
|-----------------|------------|------------------|----------------------|---------------------------|---------------|-----------------|------------|
| Male<br>(n=2)   | Mean       | 278              | 12.8                 | 1510                      | 79.8          | 0.199           | 369        |
|                 | SD         | 27.3             | 1.41                 | 71.9                      | 5.02          | 0.00702         | 51.2       |
| Female<br>(n=2) | Mean       | 201              | 12.9                 | 1400                      | 71.8          | 0.256           | 275        |
|                 | SD         | 45.8             | 0.212                | 233                       | 4.5           | 0.0741          | 69.8       |

1235 **Notes:**

1236  $t_{1/2}$ : half time (or half life)

1237  $T_{max}$ : time at maximum concentration

1238  $C_{max}$ : maximum concentration

1239  $AUC_{last}$ : area under the concentration-time curve from time zero to the last time point

1240 Vd: volume of distribution

1241 Cl: plasma clearance

1242 MRT: mean residence time

1243

1244

1245

1246

1247

1248

1249

1250

1251

1252

1253

1254

1255

1256

1257

1258

1259

1260

1261 **Table S2. Cryo-EM data collection and model refinement statistics. Related to**  
1262 **Figures 6.**

**Data collection and reconstruction statistics**

---

|                                                 |                   |                   |
|-------------------------------------------------|-------------------|-------------------|
| Protein                                         | SARS-CoV-2 S-HB27 | Binding interface |
| Voltage (kV)                                    | 300               | 300               |
| Detector                                        | K2                | K2                |
| Pixel size (Å)                                  | 1.04              | 1.04              |
| Electron dose (e <sup>-</sup> /Å <sup>2</sup> ) | 60                | 60                |
| Defocus range (μm)                              | 1.25-2.7          | 1.25-2.7          |
| Final particles                                 | 798,515           | 393,321           |
| Final resolution (Å)                            | 3.5               | 3.9               |

**Models refinement and validation statistics**

---

Ramachandran statistics

|                      |       |       |
|----------------------|-------|-------|
| Favored (%)          | 92.25 | 95.07 |
| Allowed (%)          | 6.65  | 3.12  |
| Outliers (%)         | 1.09  | 1.81  |
| Rotamer outliers (%) | 0.18  | 0.22  |

R.m.s.d

|                  |       |       |
|------------------|-------|-------|
| Bond lengths (Å) | 0.012 | 0.014 |
| Bond angles (°)  | 1.288 | 1.374 |

---

1263  
1264  
1265  
1266  
1267  
1268  
1269  
1270  
1271  
1272  
1273  
1274  
1275  
1276

1277

1278 **Table S3. Residues of HB27 Fab interacting with the SARS-CoV-2 S trimer at the**  
1279 **binding interface ( $d < 4 \text{ \AA}$ ). Related to Figure 6.**

1280

| <b>S-RBD</b>                                      |                 | <b>HB27 Fab</b>    |                    |
|---------------------------------------------------|-----------------|--------------------|--------------------|
| <b>Location</b>                                   | <b>Residues</b> | <b>Heavy chain</b> | <b>Light chain</b> |
| <b><math>\beta 4</math></b>                       | N437            | G54, G55           |                    |
| <b><math>\alpha 4</math></b>                      | N440            | S52, G55, S56, Y57 |                    |
| <b><math>\alpha 4</math>-<math>\beta 5</math></b> | V445            | Y57                |                    |
|                                                   | G446            |                    | K95                |
|                                                   | Y449            |                    | N30, Y31           |
| <b><math>\beta 6</math>-<math>\eta 4</math></b>   | P499            | Y57                |                    |
|                                                   | T500            | E50                |                    |
|                                                   | N501            | G102               |                    |
| <b><math>\eta 4</math></b>                        | G502            | N31, Y101          |                    |
|                                                   | V503            | N31, S53           |                    |
|                                                   | Y505            | Y101, G102         |                    |
| <b><math>\eta 4</math>-<math>\beta 7</math></b>   | Q506            | S53                |                    |

1281

1282

1283

1284

1285
